# Supplementary material for: A Keratin 12 Expression-Based Analysis of Stem-Precursor Cells and Differentiation in The Limbal-Corneal Epithelium Using Single-Cell RNA-Seq Data
Source: Preprints.org preprint supplement (doi:10.20944/preprints202401.1437.v1), 2024-01-18
Supplement: Supplementary file 1 [file supplementary]

GENES DOWNREGULATEDAT THE D0 TO D1 TRANSITION

| **ANK** | **Gene ID** | **Mean** | **BHp** | **R** |  | |  |  |  |  |  |  |  |  |  |  |  |  |  |  |
| --- | --- | --- | --- | --- | --- | --- | --- | --- | --- | --- | --- | --- | --- | --- | --- | --- | --- | --- | --- | --- |
|  | **KRT12** | 484.57 | 0.00E+00 | 0 |  | |  |  |  |  |  |  |  |  |  |  |  |  |  |  |
|  |  |  |  |  |  |  | |  |  |  |  |  |  |  |  |  |  |  |  |  |
| ***1*** | ***GRASP*** | ***3.8*** | ***8.55E-07*** | ***1.76*** | ***71*** | ***ERF*** | | ***7.64*** | ***4.46E-07*** | ***1.41*** | ***141*** | ***CSRNP2*** | ***3.43*** | ***7.45E-04*** | ***1.34*** | ***211*** | ***TAPT1*** | ***2.81*** | ***5.06E-03*** | ***1.29*** |
| ***2*** | ***NR2F2*** | ***3.72*** | ***3.27E-06*** | ***1.75*** | ***72*** | ***ZNF503*** | | ***8.98*** | ***3.29E-05*** | ***1.41*** | ***142*** | ***IRF1*** | ***19.85*** | ***1.33E-03*** | ***1.34*** | ***212*** | ***OGFOD1*** | ***3.35*** | ***6.62E-03*** | ***1.29*** |
| ***3*** | ***ARC*** | ***12.99*** | ***9.04E-04*** | ***1.71*** | ***73*** | ***CLEC2B*** | | ***24.2*** | ***3.16E-04*** | ***1.41*** | ***143*** | ***MRPS11*** | ***2.94*** | ***3.32E-03*** | ***1.34*** | ***213*** | ***TARSL2*** | ***2.93*** | ***8.30E-03*** | ***1.29*** |
| ***4*** | ***IER5L*** | ***4.59*** | ***3.08E-04*** | ***1.7*** | ***74*** | ***SPRY4*** | | ***2.44*** | ***7.89E-04*** | ***1.41*** | ***144*** | ***CDKN1C*** | ***13.65*** | ***4.78E-03*** | ***1.34*** | ***214*** | ***CDK2AP2*** | ***5.92*** | ***8.95E-03*** | ***1.29*** |
| ***5*** | ***ANKRD37*** | ***8.1*** | ***4.70E-04*** | ***1.67*** | ***75*** | ***SAE1*** | | ***2.34*** | ***2.28E-03*** | ***1.41*** | ***145*** | ***HS6ST1*** | ***2.69*** | ***6.17E-03*** | ***1.34*** | ***215*** | ***GEMIN4*** | ***2.68*** | ***8.97E-03*** | ***1.29*** |
| ***6*** | ***OSGIN1*** | ***3.27*** | ***1.05E-06*** | ***1.66*** | ***76*** | ***RAI2*** | | ***2.65*** | ***5.34E-03*** | ***1.41*** | ***146*** | ***JUN*** | ***312.91*** | ***2.10E-08*** | ***1.33*** | ***216*** | ***HSPA1B*** | ***46.06*** | ***9.61E-03*** | ***1.29*** |
| ***7*** | ***NPPC*** | ***6.37*** | ***6.20E-05*** | ***1.66*** | ***77*** | ***SHARPIN*** | | ***2.41*** | ***6.39E-03*** | ***1.41*** | ***147*** | ***VDAC3*** | ***5.8*** | ***9.52E-05*** | ***1.33*** | ***217*** | ***CKB*** | ***42.76*** | ***4.07E-10*** | ***1.28*** |
| ***8*** | ***SOCS1*** | ***5.95*** | ***1.11E-05*** | ***1.65*** | ***78*** | ***HSPA1A*** | | ***128.39*** | ***9.80E-03*** | ***1.41*** | ***148*** | ***TMEM39A*** | ***4.01*** | ***7.49E-04*** | ***1.33*** | ***218*** | ***P4HB*** | ***12.43*** | ***1.63E-06*** | ***1.28*** |
| ***9*** | ***POU3F1*** | ***9.79*** | ***3.88E-08*** | ***1.64*** | ***79*** | ***NUDCD2*** | | ***6.41*** | ***3.24E-07*** | ***1.4*** | ***149*** | ***MRPL49*** | ***3.99*** | ***7.96E-04*** | ***1.33*** | ***219*** | ***TM2D3*** | ***6.87*** | ***4.12E-05*** | ***1.28*** |
| ***10*** | ***NCKAP5L*** | ***2.94*** | ***3.86E-07*** | ***1.63*** | ***80*** | ***ZFP36L2*** | | ***41.64*** | ***9.97E-06*** | ***1.4*** | ***150*** | ***ATN1*** | ***3.7*** | ***1.38E-03*** | ***1.33*** | ***220*** | ***HCAR2*** | ***30.53*** | ***7.14E-05*** | ***1.28*** |
| ***11*** | ***TUSC1*** | ***5.32*** | ***7.90E-05*** | ***1.62*** | ***81*** | ***MBD3*** | | ***3.33*** | ***4.64E-05*** | ***1.4*** | ***151*** | ***RXRB*** | ***2.79*** | ***3.61E-03*** | ***1.33*** | ***221*** | ***RNF103*** | ***7.8*** | ***3.54E-04*** | ***1.28*** |
| ***12*** | ***cyp26*** | ***4.97*** | ***2.07E-03*** | ***1.61*** | ***82*** | ***ASF1A*** | | ***3.86*** | ***5.78E-05*** | ***1.4*** | ***152*** | ***SEC22A*** | ***2.79*** | ***3.91E-03*** | ***1.33*** | ***222*** | ***MAF1*** | ***6.16*** | ***6.99E-04*** | ***1.28*** |
| ***13*** | ***TNFSF9*** | ***3.73*** | ***2.70E-05*** | ***1.6*** | ***83*** | ***APTR*** | | ***3.09*** | ***4.24E-04*** | ***1.4*** | ***153*** | ***ATG4D*** | ***2.73*** | ***5.69E-03*** | ***1.33*** | ***223*** | ***B4GALT4*** | ***5.67*** | ***1.19E-03*** | ***1.28*** |
| ***14*** | ***TPM2*** | ***3.03*** | ***5.71E-04*** | ***1.6*** | ***84*** | ***PRPSAP1*** | | ***5.91*** | ***5.36E-04*** | ***1.4*** | ***154*** | ***PRR14*** | ***2.86*** | ***6.00E-03*** | ***1.33*** | ***224*** | ***EED*** | ***4.93*** | ***1.34E-03*** | ***1.28*** |
| ***15*** | ***SCARA3*** | ***3.72*** | ***1.28E-03*** | ***1.6*** | ***85*** | ***AC020916.1*** | | ***28.17*** | ***5.28E-08*** | ***1.39*** | ***155*** | ***RBM4B*** | ***2.53*** | ***6.39E-03*** | ***1.33*** | ***225*** | ***TGFBR1*** | ***3.84*** | ***3.96E-03*** | ***1.28*** |
| ***16*** | ***TMEM263*** | ***4.54*** | ***1.03E-08*** | ***1.59*** | ***86*** | ***SYNPO2*** | | ***11.95*** | ***1.11E-05*** | ***1.39*** | ***156*** | ***MXD4*** | ***3.01*** | ***9.85E-03*** | ***1.33*** | ***226*** | ***VSNL1*** | ***14.15*** | ***3.97E-03*** | ***1.28*** |
| ***17*** | ***ID3*** | ***14.82*** | ***1.85E-03*** | ***1.59*** | ***87*** | ***COQ10A*** | | ***4.38*** | ***2.04E-05*** | ***1.39*** | ***157*** | ***UAP1*** | ***19.43*** | ***1.82E-07*** | ***1.32*** | ***227*** | ***CHKA*** | ***4.18*** | ***4.17E-03*** | ***1.28*** |
| ***18*** | ***ARL4A*** | ***11.77*** | ***1.38E-07*** | ***1.57*** | ***88*** | ***TTC32*** | | ***4.87*** | ***2.59E-05*** | ***1.39*** | ***158*** | ***ZC3H12A*** | ***25.67*** | ***2.49E-06*** | ***1.32*** | ***228*** | ***CDC27*** | ***3.97*** | ***4.63E-03*** | ***1.28*** |
| ***19*** | ***GEM*** | ***14.65*** | ***3.59E-04*** | ***1.57*** | ***89*** | ***CKS1B*** | | ***5.53*** | ***1.44E-04*** | ***1.39*** | ***159*** | ***KLF16*** | ***5.98*** | ***9.52E-05*** | ***1.32*** | ***229*** | ***NUDT11*** | ***4.3*** | ***5.39E-03*** | ***1.28*** |
| ***20*** | ***H2AFX*** | ***23.37*** | ***2.50E-11*** | ***1.56*** | ***90*** | ***SAP30*** | | ***4.79*** | ***2.00E-04*** | ***1.39*** | ***160*** | ***CCDC66*** | ***3.76*** | ***1.14E-03*** | ***1.32*** | ***230*** | ***VKORC1*** | ***3.82*** | ***6.26E-03*** | ***1.28*** |
| ***21*** | ***HSPA2*** | ***9.23*** | ***3.84E-07*** | ***1.55*** | ***91*** | ***ZNF302*** | | ***3.48*** | ***3.89E-04*** | ***1.39*** | ***161*** | ***EZH2*** | ***5.27*** | ***1.59E-03*** | ***1.32*** | ***231*** | ***CCNQ*** | ***3.3*** | ***6.95E-03*** | ***1.28*** |
| ***22*** | ***USP31*** | ***5.59*** | ***1.40E-06*** | ***1.55*** | ***92*** | ***FRAT2*** | | ***4.23*** | ***2.42E-03*** | ***1.39*** | ***162*** | ***ZNF84*** | ***2.68*** | ***6.37E-03*** | ***1.32*** | ***232*** | ***RIMKLB*** | ***3.09*** | ***7.68E-03*** | ***1.28*** |
| ***23*** | ***SLC2A4RG*** | ***3.58*** | ***1.32E-04*** | ***1.54*** | ***93*** | ***HMGB3*** | | ***2.91*** | ***2.60E-03*** | ***1.39*** | ***163*** | ***ARL14EP*** | ***5.89*** | ***4.22E-05*** | ***1.31*** | ***233*** | ***ATP2C1*** | ***2.98*** | ***8.67E-03*** | ***1.28*** |
| ***24*** | ***ABHD17B*** | ***2.55*** | ***1.47E-04*** | ***1.54*** | ***94*** | ***ZSCAN16-AS1*** | | ***2.5*** | ***4.75E-03*** | ***1.39*** | ***164*** | ***NSMCE3*** | ***8.33*** | ***1.81E-04*** | ***1.31*** | ***234*** | ***CREBZF*** | ***8.94*** | ***1.39E-05*** | ***1.27*** |
| ***25*** | ***AC027031.2*** | ***2.74*** | ***9.36E-04*** | ***1.54*** | ***95*** | ***C12orf65*** | | ***8.03*** | ***6.92E-07*** | ***1.38*** | ***165*** | ***PPP2R5B*** | ***7.51*** | ***2.14E-04*** | ***1.31*** | ***235*** | ***MTCH2*** | ***8.03*** | ***8.02E-05*** | ***1.27*** |
| ***26*** | ***STMN1*** | ***16.89*** | ***5.29E-09*** | ***1.53*** | ***96*** | ***TOB1*** | | ***24.97*** | ***1.96E-06*** | ***1.38*** | ***166*** | ***SGK3*** | ***7.15*** | ***2.23E-04*** | ***1.31*** | ***236*** | ***CRNDE*** | ***8.14*** | ***8.95E-05*** | ***1.27*** |
| ***27*** | ***THAP11*** | ***2.48*** | ***3.84E-04*** | ***1.53*** | ***97*** | ***CITED2*** | | ***45.29*** | ***3.19E-05*** | ***1.38*** | ***167*** | ***ATF3*** | ***66.7*** | ***3.35E-04*** | ***1.31*** | ***237*** | ***SLC19A2*** | ***14.66*** | ***2.48E-04*** | ***1.27*** |
| ***28*** | ***EIF1AY*** | ***5.13*** | ***4.13E-05*** | ***1.51*** | ***98*** | ***ERO1B*** | | ***4.56*** | ***3.96E-05*** | ***1.38*** | ***168*** | ***SUMO3*** | ***6.25*** | ***3.90E-04*** | ***1.31*** | ***238*** | ***GSTM3*** | ***5.11*** | ***7.77E-04*** | ***1.27*** |
| ***29*** | ***FOS*** | ***91.41*** | ***1.32E-04*** | ***1.51*** | ***99*** | ***VCPKMT*** | | ***4.76*** | ***6.39E-05*** | ***1.38*** | ***169*** | ***BASP1*** | ***15.58*** | ***4.68E-04*** | ***1.31*** | ***239*** | ***PAX6*** | ***17.91*** | ***8.06E-04*** | ***1.27*** |
| ***30*** | ***CEBPA*** | ***5.49*** | ***1.14E-03*** | ***1.51*** | ***100*** | ***MAPKAPK5-AS1*** | | ***3.77*** | ***1.31E-04*** | ***1.38*** | ***170*** | ***DDX28*** | ***3.59*** | ***4.76E-04*** | ***1.31*** | ***240*** | ***AEBP2*** | ***5.26*** | ***1.15E-03*** | ***1.27*** |
| ***31*** | ***CBX4*** | ***8.42*** | ***3.07E-06*** | ***1.5*** | ***101*** | ***LETMD1*** | | ***2.74*** | ***1.76E-03*** | ***1.38*** | ***171*** | ***LARP6*** | ***4.12*** | ***1.58E-03*** | ***1.31*** | ***241*** | ***RCN2*** | ***7.14*** | ***1.37E-03*** | ***1.27*** |
| ***32*** | ***TXNDC11*** | ***2.74*** | ***3.09E-04*** | ***1.5*** | ***102*** | ***JMY*** | | ***2.88*** | ***3.46E-03*** | ***1.38*** | ***172*** | ***ZBTB44*** | ***4.07*** | ***1.60E-03*** | ***1.31*** | ***242*** | ***C3orf58*** | ***6.61*** | ***2.38E-03*** | ***1.27*** |
| ***33*** | ***BDKRB1*** | ***4.65*** | ***4.57E-03*** | ***1.5*** | ***103*** | ***RFXANK*** | | ***2.33*** | ***8.29E-03*** | ***1.38*** | ***173*** | ***DDX49*** | ***3.38*** | ***2.23E-03*** | ***1.31*** | ***243*** | ***SDHA*** | ***5.11*** | ***3.16E-03*** | ***1.27*** |
| ***34*** | ***JUND*** | ***199.14*** | ***9.95E-16*** | ***1.49*** | ***104*** | ***SOCS3*** | | ***20.51*** | ***8.19E-07*** | ***1.37*** | ***174*** | ***MTMR9*** | ***3.01*** | ***2.24E-03*** | ***1.31*** | ***244*** | ***LYSMD3*** | ***4.5*** | ***3.77E-03*** | ***1.27*** |
| ***35*** | ***HMGB2*** | ***11.36*** | ***4.86E-07*** | ***1.49*** | ***105*** | ***LUC7L2*** | | ***6.62*** | ***1.01E-06*** | ***1.37*** | ***175*** | ***ARFRP1*** | ***3.1*** | ***2.70E-03*** | ***1.31*** | ***245*** | ***EPHX1*** | ***4.99*** | ***3.80E-03*** | ***1.27*** |
| ***36*** | ***POMZP3*** | ***2.73*** | ***2.93E-05*** | ***1.49*** | ***106*** | ***MED26*** | | ***5.37*** | ***1.29E-05*** | ***1.37*** | ***176*** | ***PAN3*** | ***3.55*** | ***3.14E-03*** | ***1.31*** | ***246*** | ***TRPM7*** | ***4.07*** | ***4.61E-03*** | ***1.27*** |
| ***37*** | ***TMEM138*** | ***2.69*** | ***8.32E-05*** | ***1.49*** | ***107*** | ***MARK1*** | | ***3.15*** | ***1.55E-03*** | ***1.37*** | ***177*** | ***TIA1*** | ***3.25*** | ***3.81E-03*** | ***1.31*** | ***247*** | ***TRNP1*** | ***3.94*** | ***6.13E-03*** | ***1.27*** |
| ***38*** | ***MEIS2*** | ***3.95*** | ***8.26E-05*** | ***1.48*** | ***108*** | ***MAZ*** | | ***3.47*** | ***2.14E-03*** | ***1.37*** | ***178*** | ***VKORC1L1*** | ***3.1*** | ***5.21E-03*** | ***1.31*** | ***248*** | ***RNF227*** | ***4.07*** | ***9.71E-03*** | ***1.27*** |
| ***39*** | ***HINT3*** | ***3.4*** | ***4.79E-04*** | ***1.48*** | ***109*** | ***POLK*** | | ***2.69*** | ***3.28E-03*** | ***1.37*** | ***179*** | ***ACOT13*** | ***4.38*** | ***6.00E-03*** | ***1.31*** | ***249*** | ***NDUFA5*** | ***18.77*** | ***1.24E-09*** | ***1.26*** |
| ***40*** | ***IRX2*** | ***11.7*** | ***2.64E-10*** | ***1.47*** | ***110*** | ***TENT5C*** | | ***3.65*** | ***3.80E-03*** | ***1.37*** | ***180*** | ***CANT1*** | ***2.77*** | ***8.25E-03*** | ***1.31*** | ***250*** | ***PITHD1*** | ***22.52*** | ***1.03E-07*** | ***1.26*** |
| ***41*** | ***TSPAN13*** | ***5*** | ***3.13E-06*** | ***1.47*** | ***111*** | ***C11orf68*** | | ***14.19*** | ***1.24E-09*** | ***1.36*** | ***181*** | ***ARL2BP*** | ***3.44*** | ***8.94E-03*** | ***1.31*** | ***251*** | ***BCAM*** | ***14.98*** | ***4.45E-05*** | ***1.26*** |
| ***42*** | ***PHLPP1*** | ***3.93*** | ***1.66E-05*** | ***1.47*** | ***112*** | ***KLF4*** | | ***91.43*** | ***1.10E-08*** | ***1.36*** | ***182*** | ***OAT*** | ***9.48*** | ***2.46E-06*** | ***1.3*** | ***252*** | ***PNPLA2*** | ***10.28*** | ***1.26E-04*** | ***1.26*** |
| ***43*** | ***FZD7*** | ***2.73*** | ***2.62E-04*** | ***1.47*** | ***113*** | ***SLC12A2*** | | ***8.77*** | ***2.91E-06*** | ***1.36*** | ***183*** | ***NEU1*** | ***9.9*** | ***8.92E-05*** | ***1.3*** | ***253*** | ***IRS1*** | ***7.88*** | ***5.10E-04*** | ***1.26*** |
| ***44*** | ***CFD*** | ***14.49*** | ***9.02E-04*** | ***1.47*** | ***114*** | ***BMP2*** | | ***21.23*** | ***4.64E-05*** | ***1.36*** | ***184*** | ***FOXC1*** | ***21.93*** | ***3.19E-04*** | ***1.3*** | ***254*** | ***STT3B*** | ***6.08*** | ***6.06E-04*** | ***1.26*** |
| ***45*** | ***EMG1*** | ***4.66*** | ***2.97E-05*** | ***1.46*** | ***115*** | ***SOX4*** | | ***111.75*** | ***3.93E-04*** | ***1.36*** | ***185*** | ***MTF2*** | ***5.11*** | ***4.16E-04*** | ***1.3*** | ***255*** | ***LAMC1*** | ***6.47*** | ***1.20E-03*** | ***1.26*** |
| ***46*** | ***EID2*** | ***2.55*** | ***3.20E-04*** | ***1.46*** | ***116*** | ***C5orf15*** | | ***3.48*** | ***4.41E-04*** | ***1.36*** | ***186*** | ***PCNA*** | ***5.25*** | ***1.00E-03*** | ***1.3*** | ***256*** | ***THAP7*** | ***5.35*** | ***1.47E-03*** | ***1.26*** |
| ***47*** | ***AL035071.1*** | ***2.12*** | ***1.30E-03*** | ***1.46*** | ***117*** | ***BOLA3*** | | ***3.93*** | ***2.35E-03*** | ***1.36*** | ***187*** | ***ADM*** | ***32.06*** | ***1.74E-03*** | ***1.3*** | ***257*** | ***AC097376.2*** | ***5.88*** | ***1.48E-03*** | ***1.26*** |
| ***48*** | ***GYG1*** | ***4.19*** | ***2.56E-03*** | ***1.46*** | ***118*** | ***C2orf69*** | | ***2.63*** | ***3.91E-03*** | ***1.36*** | ***188*** | ***FSTL3*** | ***5.57*** | ***3.13E-03*** | ***1.3*** | ***258*** | ***RPA2*** | ***5.82*** | ***1.90E-03*** | ***1.26*** |
| ***49*** | ***TSLP*** | ***9.21*** | ***4.22E-03*** | ***1.46*** | ***119*** | ***GLA*** | | ***14.56*** | ***8.70E-03*** | ***1.36*** | ***189*** | ***CTPS1*** | ***3.44*** | ***5.76E-03*** | ***1.3*** | ***259*** | ***EGR3*** | ***11.98*** | ***3.80E-03*** | ***1.26*** |
| ***50*** | ***CEP290*** | ***2.67*** | ***5.15E-03*** | ***1.46*** | ***120*** | ***HEXIM1*** | | ***20.82*** | ***1.14E-08*** | ***1.35*** | ***190*** | ***KANSL1L*** | ***3.34*** | ***6.84E-03*** | ***1.3*** | ***260*** | ***RAB28*** | ***3.74*** | ***6.85E-03*** | ***1.26*** |
| ***51*** | ***MYLIP*** | ***12.03*** | ***7.66E-07*** | ***1.45*** | ***121*** | ***SNHG7*** | | ***31.81*** | ***8.06E-08*** | ***1.35*** | ***191*** | ***SPATA2*** | ***2.68*** | ***8.26E-03*** | ***1.3*** | ***261*** | ***SRSF6*** | ***23.05*** | ***3.84E-09*** | ***1.25*** |
| ***52*** | ***PER1*** | ***7.52*** | ***8.34E-06*** | ***1.45*** | ***122*** | ***ROBO1*** | | ***7.55*** | ***1.22E-06*** | ***1.35*** | ***192*** | ***IFRD1*** | ***64.53*** | ***4.23E-10*** | ***1.29*** | ***262*** | ***NFKBIA*** | ***265.1*** | ***2.27E-08*** | ***1.25*** |
| ***53*** | ***EGLN1*** | ***3.78*** | ***8.49E-04*** | ***1.45*** | ***123*** | ***ELF3*** | | ***84.93*** | ***5.95E-06*** | ***1.35*** | ***193*** | ***IER5*** | ***66.3*** | ***4.93E-10*** | ***1.29*** | ***263*** | ***KHDC4*** | ***13.61*** | ***6.06E-06*** | ***1.25*** |
| ***54*** | ***NFIB*** | ***4.73*** | ***4.14E-05*** | ***1.44*** | ***124*** | ***INAVA*** | | ***11.05*** | ***7.05E-06*** | ***1.35*** | ***194*** | ***IRS2*** | ***27.19*** | ***1.72E-08*** | ***1.29*** | ***264*** | ***KCTD5*** | ***9.32*** | ***5.42E-05*** | ***1.25*** |
| ***55*** | ***RHOB*** | ***12.88*** | ***2.80E-04*** | ***1.44*** | ***125*** | ***SMAD4*** | | ***5.01*** | ***1.79E-05*** | ***1.35*** | ***195*** | ***UBE2S*** | ***64.67*** | ***1.75E-08*** | ***1.29*** | ***265*** | ***DOHH*** | ***6.69*** | ***5.89E-05*** | ***1.25*** |
| ***56*** | ***ALKBH5*** | ***3.35*** | ***8.78E-04*** | ***1.44*** | ***126*** | ***NUDT4*** | | ***6.97*** | ***2.90E-05*** | ***1.35*** | ***196*** | ***UNC50*** | ***10.07*** | ***2.06E-07*** | ***1.29*** | ***266*** | ***LMO4*** | ***27.23*** | ***1.48E-04*** | ***1.25*** |
| ***57*** | ***VEGFC*** | ***4.55*** | ***2.85E-03*** | ***1.44*** | ***127*** | ***RPS4Y1*** | | ***16.45*** | ***2.19E-04*** | ***1.35*** | ***197*** | ***HERPUD1*** | ***54.71*** | ***1.79E-06*** | ***1.29*** | ***267*** | ***TBCC*** | ***6.94*** | ***4.16E-04*** | ***1.25*** |
| ***58*** | ***CXCL8*** | ***122.51*** | ***3.42E-03*** | ***1.44*** | ***128*** | ***ISOC1*** | | ***3.66*** | ***6.43E-04*** | ***1.35*** | ***198*** | ***ATP1B1*** | ***56.71*** | ***2.23E-05*** | ***1.29*** | ***268*** | ***SGK1*** | ***41.92*** | ***1.22E-03*** | ***1.25*** |
| ***59*** | ***EGOT*** | ***2.87*** | ***3.90E-03*** | ***1.44*** | ***129*** | ***MAFB*** | | ***23.12*** | ***7.80E-04*** | ***1.35*** | ***199*** | ***DNAJB9*** | ***36.32*** | ***4.20E-05*** | ***1.29*** | ***269*** | ***SARNP*** | ***5.52*** | ***1.47E-03*** | ***1.25*** |
| ***60*** | ***ID4*** | ***45.52*** | ***7.11E-07*** | ***1.43*** | ***130*** | ***MAN1B1*** | | ***2.77*** | ***1.48E-03*** | ***1.35*** | ***200*** | ***FAM53C*** | ***9.77*** | ***8.53E-05*** | ***1.29*** | ***270*** | ***PRPSAP2*** | ***5.28*** | ***1.92E-03*** | ***1.25*** |
| ***61*** | ***C9orf3*** | ***11.77*** | ***3.36E-06*** | ***1.43*** | ***131*** | ***C9orf72*** | | ***3.09*** | ***1.52E-03*** | ***1.35*** | ***201*** | ***PLEKHF2*** | ***8.83*** | ***9.05E-05*** | ***1.29*** | ***271*** | ***MRPL9*** | ***4.79*** | ***2.33E-03*** | ***1.25*** |
| ***62*** | ***KLF2*** | ***6.86*** | ***7.32E-04*** | ***1.43*** | ***132*** | ***ZC2HC1A*** | | ***2.34*** | ***3.29E-03*** | ***1.35*** | ***202*** | ***KPNA2*** | ***14.24*** | ***2.85E-04*** | ***1.29*** | ***272*** | ***TWSG1*** | ***5.62*** | ***2.48E-03*** | ***1.25*** |
| ***63*** | ***C14orf28*** | ***2.19*** | ***1.27E-03*** | ***1.43*** | ***133*** | ***SAPCD2*** | | ***4.23*** | ***4.25E-03*** | ***1.35*** | ***203*** | ***RASSF1*** | ***4.28*** | ***1.26E-03*** | ***1.29*** | ***273*** | ***FAM89B*** | ***5.92*** | ***4.61E-03*** | ***1.25*** |
| ***64*** | ***KIF1BP*** | ***2.6*** | ***1.40E-03*** | ***1.43*** | ***134*** | ***ZNHIT2*** | | ***2.14*** | ***4.32E-03*** | ***1.35*** | ***204*** | ***SPATS2*** | ***5.61*** | ***1.27E-03*** | ***1.29*** | ***274*** | ***PEX13*** | ***5.51*** | ***6.27E-03*** | ***1.25*** |
| ***65*** | ***FBXL15*** | ***2.58*** | ***3.46E-03*** | ***1.43*** | ***135*** | ***NPHP3*** | | ***2.61*** | ***4.96E-03*** | ***1.35*** | ***205*** | ***CKS2*** | ***17.63*** | ***1.58E-03*** | ***1.29*** | ***275*** | ***C3orf14*** | ***5.48*** | ***6.61E-03*** | ***1.25*** |
| ***66*** | ***PIK3IP1*** | ***5.92*** | ***8.55E-03*** | ***1.43*** | ***136*** | ***CUEDC2*** | | ***3.03*** | ***8.51E-03*** | ***1.35*** | ***206*** | ***RNF217*** | ***5.47*** | ***1.99E-03*** | ***1.29*** | ***276*** | ***DCUN1D4*** | ***4.64*** | ***7.84E-03*** | ***1.25*** |
| ***67*** | ***SFR1*** | ***6.7*** | ***1.88E-06*** | ***1.42*** | ***137*** | ***DEGS1*** | | ***11.88*** | ***5.08E-07*** | ***1.34*** | ***207*** | ***RDH10*** | ***11.86*** | ***2.29E-03*** | ***1.29*** | ***277*** | ***CRLS1*** | ***3.64*** | ***9.06E-03*** | ***1.25*** |
| ***68*** | ***MZT1*** | ***4.1*** | ***4.33E-05*** | ***1.42*** | ***138*** | ***SNHG12*** | | ***29.33*** | ***1.01E-06*** | ***1.34*** | ***208*** | ***PPP4R4*** | ***5.16*** | ***3.51E-03*** | ***1.29*** | ***278*** | ***BEX2*** | ***20.02*** | ***5.26E-06*** | ***1.24*** |
| ***69*** | ***ZSCAN18*** | ***3.27*** | ***3.18E-04*** | ***1.42*** | ***139*** | ***MYC*** | | ***26.24*** | ***1.51E-05*** | ***1.34*** | ***209*** | ***ZNF701*** | ***3.93*** | ***3.70E-03*** | ***1.29*** | ***279*** | ***MEPCE*** | ***11.34*** | ***1.89E-05*** | ***1.24*** |
| ***70*** | ***NARF*** | ***3.97*** | ***4.15E-04*** | ***1.42*** | ***140*** | ***SPATA2L*** | | ***4.68*** | ***4.72E-05*** | ***1.34*** | ***210*** | ***ARID1B*** | ***4.67*** | ***3.83E-03*** | ***1.29*** | ***280*** | ***NFIL3*** | ***15.75*** | ***1.67E-04*** | ***1.24*** |
|  |  |  |  |  |  |  | |  |  |  |  |  |  |  |  |  |  |  |  |  |
|  |  |  |  |  |  |  | |  |  |  |  |  |  |  |  |  |  |  |  |  |
|  |  |  |  |  |  |  | |  |  |  |  |  |  |  |  |  |  |  |  |  |
|  |  |  |  |  |  |  | |  |  |  |  |  |  |  |  |  |  |  |  |  |
| ***281*** | ***PGRMC1*** | ***13.32*** | ***2.18E-04*** | ***1.24*** | ***351*** | ***TSC22D1*** | | ***74.4*** | ***1.65E-04*** | ***1.21*** | ***421*** | ***ILKAP*** | ***7.66*** | ***3.60E-03*** | ***1.18*** | ***491*** | ***BRD2*** | ***87.79*** | ***4.96E-06*** | ***1.14*** |
| ***282*** | ***SLC6A6*** | ***14.37*** | ***3.46E-04*** | ***1.24*** | ***353*** | ***UBB*** | | ***219.87*** | ***7.74E-04*** | ***1.21*** | ***422*** | ***NDUFA9*** | ***6.57*** | ***6.62E-03*** | ***1.18*** | ***492*** | ***EIF4A1*** | ***68.01*** | ***6.77E-06*** | ***1.14*** |
| ***283*** | ***PHB2*** | ***8.71*** | ***4.53E-04*** | ***1.24*** | ***354*** | ***POR*** | | ***7.62*** | ***9.01E-04*** | ***1.21*** | ***423*** | ***FAM241A*** | ***15.68*** | ***6.95E-03*** | ***1.18*** | ***493*** | ***BUD23*** | ***28.91*** | ***4.07E-05*** | ***1.14*** |
| ***284*** | ***ING1*** | ***12.57*** | ***9.02E-04*** | ***1.24*** | ***355*** | ***RBMS1*** | | ***10.6*** | ***1.14E-03*** | ***1.21*** | ***424*** | ***HADHB*** | ***8.23*** | ***7.66E-03*** | ***1.18*** | ***494*** | ***YTHDF2*** | ***26.98*** | ***7.02E-05*** | ***1.14*** |
| ***285*** | ***PTTG1*** | ***16.84*** | ***1.27E-03*** | ***1.24*** | ***356*** | ***MANF*** | | ***21.26*** | ***1.22E-03*** | ***1.21*** | ***425*** | ***SRSF2*** | ***57.07*** | ***1.03E-06*** | ***1.17*** | ***495*** | ***VMP1*** | ***124.16*** | ***7.44E-05*** | ***1.14*** |
| ***286*** | ***CXCL14*** | ***131.22*** | ***2.06E-03*** | ***1.24*** | ***357*** | ***FOXO3*** | | ***9.29*** | ***2.69E-03*** | ***1.21*** | ***426*** | ***SUMO1*** | ***33.18*** | ***5.82E-06*** | ***1.17*** | ***496*** | ***FHL2*** | ***51.19*** | ***1.02E-04*** | ***1.14*** |
| ***287*** | ***CENPC*** | ***6.64*** | ***2.79E-03*** | ***1.24*** | ***358*** | ***RNF5*** | | ***7.92*** | ***3.15E-03*** | ***1.21*** | ***427*** | ***TGIF1*** | ***53.74*** | ***2.23E-05*** | ***1.17*** | ***497*** | ***PTMS*** | ***92.33*** | ***1.44E-04*** | ***1.14*** |
| ***288*** | ***TRIM27*** | ***4.96*** | ***3.60E-03*** | ***1.24*** | ***359*** | ***TEAD3*** | | ***7.87*** | ***4.37E-03*** | ***1.21*** | ***428*** | ***OVOL1*** | ***52.83*** | ***4.38E-05*** | ***1.17*** | ***498*** | ***SELENOT*** | ***22.58*** | ***3.18E-04*** | ***1.14*** |
| ***289*** | ***MGAT2*** | ***6.31*** | ***4.16E-03*** | ***1.24*** | ***360*** | ***ZNF567*** | | ***5.97*** | ***4.92E-03*** | ***1.21*** | ***429*** | ***SARAF*** | ***25.49*** | ***7.39E-05*** | ***1.17*** | ***499*** | ***RTF1*** | ***22.07*** | ***4.07E-04*** | ***1.14*** |
| ***290*** | ***DUS1L*** | ***5.83*** | ***4.33E-03*** | ***1.24*** | ***361*** | ***CREG1*** | | ***6.42*** | ***5.66E-03*** | ***1.21*** | ***430*** | ***PDCD7*** | ***13.78*** | ***6.01E-04*** | ***1.17*** | ***500*** | ***XBP1*** | ***60.95*** | ***6.30E-04*** | ***1.14*** |
| ***291*** | ***TRAC*** | ***22.83*** | ***4.43E-03*** | ***1.24*** | ***362*** | ***AAMDC*** | | ***6.47*** | ***5.94E-03*** | ***1.21*** | ***431*** | ***MAP4K5*** | ***18.2*** | ***7.76E-04*** | ***1.17*** | ***501*** | ***WTAP*** | ***39.87*** | ***7.00E-04*** | ***1.14*** |
| ***292*** | ***ZBTB17*** | ***5.58*** | ***4.95E-03*** | ***1.24*** | ***363*** | ***MECP2*** | | ***6.27*** | ***5.96E-03*** | ***1.21*** | ***432*** | ***IVNS1ABP*** | ***22.74*** | ***8.36E-04*** | ***1.17*** | ***502*** | ***ATP5F1C*** | ***19.16*** | ***8.78E-04*** | ***1.14*** |
| ***293*** | ***CREM*** | ***4.8*** | ***5.63E-03*** | ***1.24*** | ***364*** | ***NKTR*** | | ***7.82*** | ***7.25E-03*** | ***1.21*** | ***433*** | ***SNX3*** | ***19.52*** | ***1.26E-03*** | ***1.17*** | ***503*** | ***MYDGF*** | ***20.9*** | ***1.67E-03*** | ***1.14*** |
| ***294*** | ***ZNF281*** | ***4.87*** | ***6.95E-03*** | ***1.24*** | ***365*** | ***GABPB1-AS*** | | ***13.31*** | ***8.05E-03*** | ***1.21*** | ***434*** | ***THAP9-AS1*** | ***19.25*** | ***1.64E-03*** | ***1.17*** | ***504*** | ***LSM8*** | ***15.09*** | ***2.92E-03*** | ***1.14*** |
| ***295*** | ***RFX2*** | ***5.82*** | ***8.71E-03*** | ***1.24*** | ***366*** | ***TMED2*** | | ***19.66*** | ***6.04E-06*** | ***1.2*** | ***435*** | ***LSM5*** | ***12.34*** | ***1.73E-03*** | ***1.17*** | ***505*** | ***SIVA1*** | ***19.58*** | ***2.93E-03*** | ***1.14*** |
| ***296*** | ***RIOK2*** | ***3.95*** | ***9.76E-03*** | ***1.24*** | ***367*** | ***HBP1*** | | ***43.09*** | ***1.08E-05*** | ***1.2*** | ***436*** | ***NXT1*** | ***13.16*** | ***3.31E-03*** | ***1.17*** | ***506*** | ***MAP3K20*** | ***21.03*** | ***3.51E-03*** | ***1.14*** |
| ***297*** | ***MT-ND1*** | ***637.05*** | ***2.52E-17*** | ***1.23*** | ***368*** | ***NCOA7*** | | ***209.51*** | ***1.09E-05*** | ***1.2*** | ***437*** | ***YIPF3*** | ***9.16*** | ***4.26E-03*** | ***1.17*** | ***507*** | ***NGDN*** | ***14.12*** | ***3.60E-03*** | ***1.14*** |
| ***298*** | ***WSB1*** | ***43.35*** | ***1.75E-08*** | ***1.23*** | ***369*** | ***ABHD5*** | | ***29.74*** | ***3.20E-05*** | ***1.2*** | ***438*** | ***ACTR10*** | ***9.72*** | ***4.47E-03*** | ***1.17*** | ***508*** | ***CEBPD*** | ***53.25*** | ***4.62E-03*** | ***1.14*** |
| ***299*** | ***PNRC1*** | ***80.65*** | ***1.28E-06*** | ***1.23*** | ***370*** | ***CSRNP1*** | | ***29.31*** | ***3.64E-05*** | ***1.2*** | ***439*** | ***AKAP17A*** | ***9.31*** | ***5.31E-03*** | ***1.17*** | ***509*** | ***PSMD13*** | ***11.57*** | ***4.96E-03*** | ***1.14*** |
| ***300*** | ***RSRP1*** | ***37.32*** | ***2.94E-05*** | ***1.23*** | ***371*** | ***TPBG*** | | ***19.56*** | ***3.30E-04*** | ***1.2*** | ***440*** | ***NR4A1*** | ***48.15*** | ***5.43E-03*** | ***1.17*** | ***510*** | ***SNF8*** | ***11.65*** | ***6.35E-03*** | ***1.14*** |
| ***301*** | ***TUBA1A*** | ***27.77*** | ***3.47E-04*** | ***1.23*** | ***372*** | ***RBM7*** | | ***10.64*** | ***5.24E-04*** | ***1.2*** | ***441*** | ***CDR2*** | ***18.27*** | ***5.82E-03*** | ***1.17*** | ***511*** | ***RNF34*** | ***13.19*** | ***9.64E-03*** | ***1.14*** |
| ***302*** | ***CTSV*** | ***58.6*** | ***4.09E-04*** | ***1.23*** | ***373*** | ***ZNHIT3*** | | ***9.99*** | ***5.98E-04*** | ***1.2*** | ***442*** | ***CMSS1*** | ***8.93*** | ***7.88E-03*** | ***1.17*** | ***512*** | ***MAFG*** | ***19.83*** | ***9.70E-03*** | ***1.14*** |
| ***303*** | ***COL18A1*** | ***10.24*** | ***4.27E-04*** | ***1.23*** | ***374*** | ***KAT5*** | | ***8.63*** | ***8.93E-04*** | ***1.2*** | ***443*** | ***ALG2*** | ***8.78*** | ***7.98E-03*** | ***1.17*** | ***513*** | ***MT-ND2*** | ***364.17*** | ***1.26E-09*** | ***1.13*** |
| ***304*** | ***NDUFA8*** | ***8.26*** | ***5.12E-04*** | ***1.23*** | ***375*** | ***COPS8*** | | ***10.37*** | ***1.51E-03*** | ***1.2*** | ***444*** | ***PSMF1*** | ***8.5*** | ***8.93E-03*** | ***1.17*** | ***514*** | ***HNRNPDL*** | ***58.72*** | ***2.79E-05*** | ***1.13*** |
| ***305*** | ***EID1*** | ***17.04*** | ***6.42E-04*** | ***1.23*** | ***376*** | ***PPTC7*** | | ***10.47*** | ***1.55E-03*** | ***1.2*** | ***445*** | ***GNAS*** | ***96.75*** | ***1.82E-08*** | ***1.16*** | ***515*** | ***CCNI*** | ***41.62*** | ***4.63E-05*** | ***1.13*** |
| ***306*** | ***TERF1*** | ***7.08*** | ***6.85E-04*** | ***1.23*** | ***377*** | ***ACAP2*** | | ***8.82*** | ***1.62E-03*** | ***1.2*** | ***446*** | ***EIF4A2*** | ***86.77*** | ***3.37E-08*** | ***1.16*** | ***516*** | ***ATP1A1*** | ***44.64*** | ***1.01E-04*** | ***1.13*** |
| ***307*** | ***DENND4A*** | ***10.36*** | ***9.43E-04*** | ***1.23*** | ***378*** | ***DDIT3*** | | ***29.05*** | ***2.44E-03*** | ***1.2*** | ***447*** | ***HNRNPA0*** | ***41.14*** | ***4.12E-07*** | ***1.16*** | ***517*** | ***STRAP*** | ***28.18*** | ***4.17E-04*** | ***1.13*** |
| ***308*** | ***HMGN2*** | ***14.93*** | ***1.97E-03*** | ***1.23*** | ***379*** | ***TENT5A*** | | ***62.46*** | ***3.79E-03*** | ***1.2*** | ***448*** | ***RTRAF*** | ***38*** | ***1.03E-06*** | ***1.16*** | ***518*** | ***PMAIP1*** | ***403.19*** | ***4.21E-04*** | ***1.13*** |
| ***309*** | ***NR4A2*** | ***14.64*** | ***3.64E-03*** | ***1.23*** | ***380*** | ***SCOC*** | | ***7.75*** | ***4.27E-03*** | ***1.2*** | ***449*** | ***TUBA1B*** | ***67.34*** | ***2.29E-06*** | ***1.16*** | ***519*** | ***AMD1*** | ***42.82*** | ***5.39E-04*** | ***1.13*** |
| ***310*** | ***WDR47*** | ***5.51*** | ***4.69E-03*** | ***1.23*** | ***381*** | ***ELOVL5*** | | ***6.18*** | ***4.27E-03*** | ***1.2*** | ***450*** | ***SOD1*** | ***62.08*** | ***1.08E-05*** | ***1.16*** | ***520*** | ***TPI1*** | ***57.04*** | ***5.42E-04*** | ***1.13*** |
| ***311*** | ***RPS6KB2*** | ***4.97*** | ***5.29E-03*** | ***1.23*** | ***382*** | ***CDC42EP4*** | | ***19.31*** | ***4.32E-03*** | ***1.2*** | ***451*** | ***CCNL1*** | ***59.6*** | ***4.46E-05*** | ***1.16*** | ***521*** | ***RSRC2*** | ***50.54*** | ***6.41E-04*** | ***1.13*** |
| ***312*** | ***UGDH*** | ***17.34*** | ***5.55E-03*** | ***1.23*** | ***383*** | ***WEE1*** | | ***25.18*** | ***4.34E-03*** | ***1.2*** | ***452*** | ***KLF6*** | ***224.21*** | ***2.12E-04*** | ***1.16*** | ***522*** | ***SPCS1*** | ***26.72*** | ***1.39E-03*** | ***1.13*** |
| ***313*** | ***RABGAP1L*** | ***7.43*** | ***6.95E-03*** | ***1.23*** | ***384*** | ***SS18*** | | ***6.81*** | ***4.45E-03*** | ***1.2*** | ***453*** | ***MPC2*** | ***19.79*** | ***2.60E-04*** | ***1.16*** | ***523*** | ***C6orf62*** | ***26.57*** | ***1.83E-03*** | ***1.13*** |
| ***314*** | ***CCDC130*** | ***4.66*** | ***8.26E-03*** | ***1.23*** | ***385*** | ***TSN*** | | ***6.15*** | ***4.63E-03*** | ***1.2*** | ***454*** | ***UBE2G1*** | ***23.29*** | ***6.80E-04*** | ***1.16*** | ***524*** | ***MYADM*** | ***40.25*** | ***1.97E-03*** | ***1.13*** |
| ***315*** | ***ANKRD40*** | ***4.37*** | ***8.38E-03*** | ***1.23*** | ***386*** | ***ATRAID*** | | ***9.73*** | ***5.47E-03*** | ***1.2*** | ***455*** | ***MLF1*** | ***31.54*** | ***7.49E-04*** | ***1.16*** | ***525*** | ***AHSA1*** | ***25.78*** | ***3.31E-03*** | ***1.13*** |
| ***316*** | ***MTERF3*** | ***3.58*** | ***9.14E-03*** | ***1.23*** | ***387*** | ***ELF2*** | | ***8.2*** | ***5.58E-03*** | ***1.2*** | ***456*** | ***AZIN1*** | ***13.53*** | ***1.10E-03*** | ***1.16*** | ***526*** | ***BTG3*** | ***37.13*** | ***4.27E-03*** | ***1.13*** |
| ***317*** | ***RAB34*** | ***5.87*** | ***9.48E-03*** | ***1.23*** | ***388*** | ***GTF2H5*** | | ***7.17*** | ***5.61E-03*** | ***1.2*** | ***457*** | ***MAP2K1*** | ***15.77*** | ***1.14E-03*** | ***1.16*** | ***527*** | ***FGFR1OP2*** | ***20.36*** | ***4.70E-03*** | ***1.13*** |
| ***318*** | ***CIRBP*** | ***52.15*** | ***1.29E-09*** | ***1.22*** | ***389*** | ***GAN*** | | ***10.04*** | ***5.65E-03*** | ***1.2*** | ***458*** | ***PISD*** | ***16.68*** | ***1.39E-03*** | ***1.16*** | ***528*** | ***ARIH1*** | ***22.75*** | ***4.97E-03*** | ***1.13*** |
| ***319*** | ***H2AFZ*** | ***174.35*** | ***2.09E-07*** | ***1.22*** | ***390*** | ***ZNF22*** | | ***5.98*** | ***6.26E-03*** | ***1.2*** | ***459*** | ***DST*** | ***140.01*** | ***1.63E-03*** | ***1.16*** | ***529*** | ***PMEPA1*** | ***22.47*** | ***5.51E-03*** | ***1.13*** |
| ***320*** | ***NPTN*** | ***25.5*** | ***2.78E-07*** | ***1.22*** | ***391*** | ***ZNF7*** | | ***5.47*** | ***6.92E-03*** | ***1.2*** | ***460*** | ***CTNNAL1*** | ***27.42*** | ***1.66E-03*** | ***1.16*** | ***530*** | ***BZW2*** | ***17.29*** | ***6.92E-03*** | ***1.13*** |
| ***321*** | ***EIF4A3*** | ***41.69*** | ***1.02E-06*** | ***1.22*** | ***392*** | ***GLUL*** | | ***30.21*** | ***7.06E-03*** | ***1.2*** | ***461*** | ***COPS3*** | ***12.94*** | ***1.91E-03*** | ***1.16*** | ***531*** | ***PRDM2*** | ***19.12*** | ***8.26E-03*** | ***1.13*** |
| ***322*** | ***UBE2D1*** | ***26.8*** | ***5.12E-06*** | ***1.22*** | ***393*** | ***UBE2W*** | | ***5.98*** | ***8.62E-03*** | ***1.2*** | ***462*** | ***RBM23*** | ***11.54*** | ***2.33E-03*** | ***1.16*** | ***532*** | ***AP2M1*** | ***17.83*** | ***8.84E-03*** | ***1.13*** |
| ***323*** | ***TLE4*** | ***23.51*** | ***6.73E-06*** | ***1.22*** | ***394*** | ***EPAS1*** | | ***10.49*** | ***8.76E-03*** | ***1.2*** | ***463*** | ***GRHL3*** | ***18.65*** | ***3.07E-03*** | ***1.16*** | ***533*** | ***TIPARP*** | ***34.79*** | ***8.98E-03*** | ***1.13*** |
| ***324*** | ***OSTC*** | ***17.35*** | ***1.25E-05*** | ***1.22*** | ***395*** | ***TRIM28*** | | ***19.05*** | ***3.16E-05*** | ***1.19*** | ***464*** | ***HIGD1A*** | ***12.77*** | ***3.11E-03*** | ***1.16*** | ***534*** | ***MT-ND4*** | ***957.19*** | ***2.82E-10*** | ***1.12*** |
| ***325*** | ***DNAJB11*** | ***15.88*** | ***2.75E-05*** | ***1.22*** | ***396*** | ***FOSB*** | | ***90.01*** | ***1.44E-04*** | ***1.19*** | ***465*** | ***ATP6AP2*** | ***11.65*** | ***4.95E-03*** | ***1.16*** | ***535*** | ***LMNA*** | ***337.75*** | ***5.34E-07*** | ***1.12*** |
| ***326*** | ***CHCHD7*** | ***14.77*** | ***4.13E-05*** | ***1.22*** | ***397*** | ***TNFAIP8*** | | ***44.09*** | ***9.07E-04*** | ***1.19*** | ***466*** | ***UBL3*** | ***13.65*** | ***5.72E-03*** | ***1.16*** | ***536*** | ***SRSF7*** | ***94.59*** | ***2.23E-05*** | ***1.12*** |
| ***327*** | ***LGMN*** | ***12.17*** | ***4.71E-05*** | ***1.22*** | ***398*** | ***ASNSD1*** | | ***9.49*** | ***1.15E-03*** | ***1.19*** | ***467*** | ***MPHOSPH8*** | ***14.49*** | ***7.06E-03*** | ***1.16*** | ***537*** | ***SRSF3*** | ***102.9*** | ***2.49E-05*** | ***1.12*** |
| ***328*** | ***NANS*** | ***13.9*** | ***8.21E-05*** | ***1.22*** | ***399*** | ***SRF*** | | ***9.29*** | ***1.53E-03*** | ***1.19*** | ***468*** | ***CREB5*** | ***27.5*** | ***9.69E-03*** | ***1.16*** | ***538*** | ***MORF4L2*** | ***61.36*** | ***9.22E-05*** | ***1.12*** |
| ***329*** | ***HSPA8*** | ***124.03*** | ***2.85E-04*** | ***1.22*** | ***400*** | ***METTL9*** | | ***8.55*** | ***2.92E-03*** | ***1.19*** | ***469*** | ***C12orf57*** | ***51.74*** | ***9.26E-07*** | ***1.15*** | ***539*** | ***ARL6IP1*** | ***51.32*** | ***2.36E-04*** | ***1.12*** |
| ***330*** | ***H1FX*** | ***68.06*** | ***4.51E-04*** | ***1.22*** | ***401*** | ***CFAP20*** | | ***8.8*** | ***4.79E-03*** | ***1.19*** | ***470*** | ***CEBPB*** | ***196.08*** | ***1.49E-06*** | ***1.15*** | ***540*** | ***SRSF10*** | ***27.97*** | ***4.44E-04*** | ***1.12*** |
| ***331*** | ***ZNRF2*** | ***9.87*** | ***8.37E-04*** | ***1.22*** | ***402*** | ***BBX*** | | ***16.36*** | ***5.21E-03*** | ***1.19*** | ***471*** | ***EPC1*** | ***35.53*** | ***1.73E-05*** | ***1.15*** | ***541*** | ***NOP53*** | ***54.07*** | ***6.22E-04*** | ***1.12*** |
| ***332*** | ***NEMF*** | ***8.92*** | ***9.80E-04*** | ***1.22*** | ***403*** | ***SELENOM*** | | ***19.09*** | ***5.94E-03*** | ***1.19*** | ***472*** | ***PAWR*** | ***63.32*** | ***2.74E-05*** | ***1.15*** | ***542*** | ***TMEM59*** | ***35.68*** | ***7.57E-04*** | ***1.12*** |
| ***333*** | ***ARID5A*** | ***13.61*** | ***1.21E-03*** | ***1.22*** | ***404*** | ***WIPI2*** | | ***8.25*** | ***7.68E-03*** | ***1.19*** | ***473*** | ***SERTAD1*** | ***80.16*** | ***1.93E-04*** | ***1.15*** | ***543*** | ***ATP1B3*** | ***44.32*** | ***1.02E-03*** | ***1.12*** |
| ***334*** | ***BEX4*** | ***8.9*** | ***1.51E-03*** | ***1.22*** | ***405*** | ***FUS*** | | ***71.56*** | ***2.58E-10*** | ***1.18*** | ***474*** | ***PRPF38B*** | ***28.02*** | ***2.46E-04*** | ***1.15*** | ***544*** | ***EFNB2*** | ***60.81*** | ***1.26E-03*** | ***1.12*** |
| ***335*** | ***RYK*** | ***10.04*** | ***4.11E-03*** | ***1.22*** | ***406*** | ***DYNLL1*** | | ***145.29*** | ***1.01E-08*** | ***1.18*** | ***475*** | ***SELENOF*** | ***19.15*** | ***3.66E-04*** | ***1.15*** | ***545*** | ***EPB41L4A-AS1*** | ***35.64*** | ***1.53E-03*** | ***1.12*** |
| ***336*** | ***YDJC*** | ***5.39*** | ***4.19E-03*** | ***1.22*** | ***407*** | ***NASP*** | | ***34.75*** | ***8.11E-06*** | ***1.18*** | ***476*** | ***LSM3*** | ***18.72*** | ***4.83E-04*** | ***1.15*** | ***546*** | ***GABARAPL2*** | ***40.64*** | ***3.14E-03*** | ***1.12*** |
| ***337*** | ***MPC1*** | ***7.02*** | ***4.29E-03*** | ***1.22*** | ***408*** | ***SNHG8*** | | ***60.8*** | ***6.13E-05*** | ***1.18*** | ***477*** | ***HSPB11*** | ***17.15*** | ***1.30E-03*** | ***1.15*** | ***547*** | ***IMPDH2*** | ***20.2*** | ***4.61E-03*** | ***1.12*** |
| ***338*** | ***ISCA1*** | ***6.51*** | ***4.64E-03*** | ***1.22*** | ***409*** | ***NDFIP1*** | | ***17.49*** | ***7.03E-05*** | ***1.18*** | ***478*** | ***FAM129A*** | ***43.65*** | ***1.51E-03*** | ***1.15*** | ***548*** | ***LDLR*** | ***31.22*** | ***4.96E-03*** | ***1.12*** |
| ***339*** | ***PUS3*** | ***5.3*** | ***5.20E-03*** | ***1.22*** | ***410*** | ***CRY1*** | | ***18.43*** | ***8.80E-05*** | ***1.18*** | ***479*** | ***REL*** | ***29.61*** | ***1.76E-03*** | ***1.15*** | ***549*** | ***NDUFC1*** | ***39.67*** | ***5.06E-03*** | ***1.12*** |
| ***340*** | ***ZNF263*** | ***5.05*** | ***5.47E-03*** | ***1.22*** | ***411*** | ***PPP1R10*** | | ***65.68*** | ***9.89E-05*** | ***1.18*** | ***480*** | ***SUPT4H1*** | ***12.79*** | ***3.14E-03*** | ***1.15*** | ***550*** | ***PALLD*** | ***68.79*** | ***5.21E-03*** | ***1.12*** |
| ***341*** | ***NXF1*** | ***7.87*** | ***5.86E-03*** | ***1.22*** | ***412*** | ***NOP56*** | | ***22.71*** | ***2.19E-04*** | ***1.18*** | ***481*** | ***PCF11*** | ***27.65*** | ***3.29E-03*** | ***1.15*** | ***551*** | ***CWC15*** | ***17.2*** | ***6.11E-03*** | ***1.12*** |
| ***342*** | ***FOXN3*** | ***9.65*** | ***5.92E-03*** | ***1.22*** | ***413*** | ***CYLD*** | | ***29.98*** | ***3.01E-04*** | ***1.18*** | ***482*** | ***H2AFV*** | ***16.44*** | ***4.54E-03*** | ***1.15*** | ***552*** | ***TERF2IP*** | ***21.98*** | ***6.67E-03*** | ***1.12*** |
| ***343*** | ***SEPHS2*** | ***8.96*** | ***6.00E-03*** | ***1.22*** | ***414*** | ***PPP1R2*** | | ***25*** | ***5.15E-04*** | ***1.18*** | ***483*** | ***ERP44*** | ***12.13*** | ***5.86E-03*** | ***1.15*** | ***553*** | ***GNAI1*** | ***29.86*** | ***6.71E-03*** | ***1.12*** |
| ***344*** | ***HSPB8*** | ***23.71*** | ***6.72E-03*** | ***1.22*** | ***415*** | ***WHAMM*** | | ***15.29*** | ***6.30E-04*** | ***1.18*** | ***484*** | ***ATP2B1*** | ***15.42*** | ***5.96E-03*** | ***1.15*** | ***554*** | ***USP12*** | ***29.16*** | ***6.85E-03*** | ***1.12*** |
| ***345*** | ***SAV1*** | ***7.15*** | ***7.51E-03*** | ***1.22*** | ***416*** | ***DERL2*** | | ***10.84*** | ***1.46E-03*** | ***1.18*** | ***485*** | ***MAP2K2*** | ***10.95*** | ***6.15E-03*** | ***1.15*** | ***555*** | ***NAA20*** | ***15.46*** | ***7.69E-03*** | ***1.12*** |
| ***346*** | ***ABHD3*** | ***5.97*** | ***8.30E-03*** | ***1.22*** | ***417*** | ***TSPYL2*** | | ***16.72*** | ***1.62E-03*** | ***1.18*** | ***486*** | ***MLEC*** | ***11.55*** | ***6.23E-03*** | ***1.15*** | ***556*** | ***CYCS*** | ***134.5*** | ***1.24E-07*** | ***1.11*** |
| ***347*** | ***PPP1R13B*** | ***5.33*** | ***8.48E-03*** | ***1.22*** | ***418*** | ***PIM3*** | | ***28.67*** | ***2.74E-03*** | ***1.18*** | ***487*** | ***IFT57*** | ***22.84*** | ***7.58E-03*** | ***1.15*** | ***557*** | ***HNRNPA2B1*** | ***135.81*** | ***1.95E-06*** | ***1.11*** |
| ***348*** | ***RIC3*** | ***4.61*** | ***9.70E-03*** | ***1.22*** | ***419*** | ***IFRD2*** | | ***8.62*** | ***3.08E-03*** | ***1.18*** | ***488*** | ***RBBP7*** | ***11.09*** | ***8.55E-03*** | ***1.15*** | ***558*** | ***KLF5*** | ***207.45*** | ***1.52E-04*** | ***1.11*** |
| ***349*** | ***CDC42EP1*** | ***78.08*** | ***2.95E-08*** | ***1.21*** | ***420*** | ***OTUD6B-AS1*** | | ***13.51*** | ***3.46E-03*** | ***1.18*** | ***489*** | ***PLEKHO1*** | ***19.73*** | ***9.35E-03*** | ***1.15*** | ***559*** | ***UBC*** | ***831.15*** | ***3.16E-04*** | ***1.11*** |
| ***350*** | ***GTF2B*** | ***44.48*** | ***3.06E-07*** | ***1.21*** |  |  | |  |  |  | ***490*** | ***SAP18*** | ***73.74*** | ***2.06E-07*** | ***1.14*** | ***560*** | ***ANKRD12*** | ***81.75*** | ***3.91E-04*** | ***1.11*** |
| ***561*** | ***PTMA*** | ***386.08*** | ***4.44E-04*** | ***1.11*** | ***576*** | ***CHMP1B*** | | ***76.98*** | ***7.47E-03*** | ***1.11*** | ***593*** | ***HSPA5*** | ***207.18*** | ***8.12E-03*** | ***1.1*** | ***609*** | ***CFL1*** | ***206.21*** | ***2.42E-05*** | ***1.08*** |
| ***562*** | ***ERH*** | ***33.08*** | ***5.13E-04*** | ***1.11*** | ***577*** | ***KMT2E*** | | ***28.91*** | ***7.83E-03*** | ***1.11*** | ***594*** | ***TAF1D*** | ***39.86*** | ***9.98E-03*** | ***1.1*** | ***610*** | ***OAZ1*** | ***129.88*** | ***1.30E-03*** | ***1.08*** |
| ***563*** | ***MTRNR2L12*** | ***43.9*** | ***5.99E-04*** | ***1.11*** | ***578*** | ***KDELR2*** | | ***21.1*** | ***8.46E-03*** | ***1.11*** | ***595*** | ***MT-CO1*** | ***2093.06*** | ***1.18E-07*** | ***1.09*** | ***611*** | ***TUBA1C*** | ***184.77*** | ***1.32E-03*** | ***1.08*** |
| ***564*** | ***PNISR*** | ***46.59*** | ***6.46E-04*** | ***1.11*** | ***579*** | ***SLC1A5*** | | ***32.06*** | ***9.00E-03*** | ***1.11*** | ***596*** | ***TUBB4B*** | ***376.22*** | ***9.65E-06*** | ***1.09*** | ***612*** | ***RAN*** | ***91.37*** | ***2.65E-03*** | ***1.08*** |
| ***565*** | ***SDCBP*** | ***76.39*** | ***8.95E-04*** | ***1.11*** | ***580*** | ***CALM1*** | | ***143.4*** | ***3.48E-05*** | ***1.1*** | ***597*** | ***YBX3*** | ***197.1*** | ***1.81E-05*** | ***1.09*** | ***613*** | ***RPL9*** | ***506.89*** | ***9.98E-06*** | ***1.07*** |
| ***566*** | ***SPCS2*** | ***37.9*** | ***1.54E-03*** | ***1.11*** | ***581*** | ***ZFAS1*** | | ***143.64*** | ***4.12E-04*** | ***1.1*** | ***598*** | ***SKP1*** | ***106.96*** | ***4.11E-05*** | ***1.09*** | ***614*** | ***MT-CYB*** | ***997.99*** | ***1.47E-04*** | ***1.07*** |
| ***567*** | ***ARID4B*** | ***41.2*** | ***1.58E-03*** | ***1.11*** | ***582*** | ***ATP5F1B*** | | ***44.35*** | ***9.79E-04*** | ***1.1*** | ***599*** | ***H3F3B*** | ***473.49*** | ***9.74E-05*** | ***1.09*** | ***615*** | ***RPL7*** | ***235.23*** | ***1.27E-03*** | ***1.07*** |
| ***568*** | ***PPIG*** | ***30.56*** | ***1.72E-03*** | ***1.11*** | ***583*** | ***MIR22HG*** | | ***94.95*** | ***3.57E-03*** | ***1.1*** | ***600*** | ***CD81*** | ***68.32*** | ***4.85E-04*** | ***1.09*** | ***616*** | ***HLA-E*** | ***202.98*** | ***8.97E-03*** | ***1.07*** |
| ***569*** | ***MAP1LC3B*** | ***84.76*** | ***1.83E-03*** | ***1.11*** | ***584*** | ***SEC61G*** | | ***44.7*** | ***4.34E-03*** | ***1.1*** | ***601*** | ***HLA-B*** | ***158.99*** | ***5.95E-04*** | ***1.09*** | ***617*** | ***MT-CO3*** | ***2864.07*** | ***9.75E-05*** | ***1.06*** |
| ***570*** | ***MAP2K3*** | ***48.49*** | ***3.34E-03*** | ***1.11*** | ***585*** | ***PSMD11*** | | ***24.73*** | ***4.34E-03*** | ***1.1*** | ***602*** | ***CNBP*** | ***55.63*** | ***1.79E-03*** | ***1.09*** | ***618*** | ***MT-ATP6*** | ***1501.18*** | ***2.50E-04*** | ***1.06*** |
| ***571*** | ***TMEM208*** | ***21.25*** | ***4.79E-03*** | ***1.11*** | ***586*** | ***SRSF11*** | | ***30.2*** | ***6.02E-03*** | ***1.1*** | ***603*** | ***CCDC59*** | ***33.27*** | ***3.22E-03*** | ***1.09*** |  |  |  |  |  |
| ***572*** | ***DAD1*** | ***30.83*** | ***5.58E-03*** | ***1.11*** | ***589*** | ***JUNB*** | | ***264.69*** | ***6.37E-03*** | ***1.1*** | ***605*** | ***EIF3E*** | ***43.78*** | ***3.34E-03*** | ***1.09*** |  |  |  |  |  |
| ***573*** | ***TMEM165*** | ***24.77*** | ***5.61E-03*** | ***1.11*** | ***590*** | ***RBMX*** | | ***26.58*** | ***6.50E-03*** | ***1.1*** | ***606*** | ***NDUFA4*** | ***59.37*** | ***5.80E-03*** | ***1.09*** |  |  |  |  |  |
| ***574*** | ***HIST1H4C*** | ***90.66*** | ***6.84E-03*** | ***1.11*** | ***591*** | ***SRP9*** | | ***26.88*** | ***7.13E-03*** | ***1.1*** | ***607*** | ***ENY2*** | ***34.65*** | ***5.90E-03*** | ***1.09*** |  |  |  |  |  |
| ***575*** | ***TSPYL1*** | ***20.52*** | ***7.25E-03*** | ***1.11*** | ***592*** | ***OSER1*** | | ***43.65*** | ***8.04E-03*** | ***1.1*** | ***608*** | ***AKIRIN1*** | ***32.13*** | ***9.08E-03*** | ***1.09*** |  |  |  |  |  |

GENES UPREGULATED IN THE D0 TO D1 (D0-D1) TRANSITION

| **RANK** | **Gene ID** | | **Mean** | **BHp** | **1/R** | |  | |  |  | |  | |  |  |  |  | |  |  |  |  |  | |  |  | |
| --- | --- | --- | --- | --- | --- | --- | --- | --- | --- | --- | --- | --- | --- | --- | --- | --- | --- | --- | --- | --- | --- | --- | --- | --- | --- | --- | --- |
|  | **KRT12** | | 484.57 | 0.00E+00 | 0 |  | | |  |  | |  | |  |  |  |  | |  |  |  |  |  |  | |  |
| ***1*** | **SPRR2A** | | 80.29 | 1.06E-05 | 2.50 | ***71*** | | **LAD1** | 5.16 | | 3.78E-03 | | ***1.41*** | | ***141*** | **SLFN5** | 31.13 | 2.10E-06 | | 1.25 | ***211*** | **RPS17** | 37.95 | 5.41E-08 | | 1.19 |
| ***2*** | **LY6D** | | 15.2 | 8.83E-04 | 2.44 | ***72*** | | **RALGPS2** | 10.92 | | 1.37E-05 | | ***1.41*** | | ***142*** | **DCBLD2** | 35.72 | 7.82E-06 | | 1.25 | ***212*** | **TJP1** | 53.9 | 2.27E-07 | | 1.19 |
| ***3*** | **SCGB2A1** | | 7.2 | 1.37E-04 | 2.22 | ***73*** | | **GJB4** | 30.89 | | 1.56E-05 | | ***1.41*** | | ***143*** | **KIAA1551** | 95.15 | 2.51E-05 | | 1.25 | ***213*** | **CLDN1** | 496.57 | 2.89E-07 | | 1.19 |
| ***4*** | **UPK1B** | | 13.1 | 3.01E-05 | 2.00 | ***74*** | | **AP001453.2** | 8.74 | | 3.33E-05 | | ***1.41*** | | ***144*** | **TXNRD1** | 66.29 | 3.96E-05 | | 1.25 | ***214*** | **PSMD12** | 29.21 | 2.21E-06 | | 1.19 |
| ***5*** | **MGST1** | | 4.73 | 4.08E-04 | 1.89 | ***75*** | | **LGALS7B** | 11.87 | | 4.45E-05 | | ***1.41*** | | ***145*** | **AMOTL2** | 23.16 | 5.05E-05 | | 1.25 | ***215*** | **PBDC1** | 32.67 | 3.14E-06 | | 1.19 |
| ***6*** | **SH3KBP1** | | 7.9 | 3.06E-04 | 1.85 | ***76*** | | **PPARD** | 11.1 | | 6.16E-05 | | ***1.41*** | | ***146*** | **EHF** | 58.28 | 1.39E-04 | | 1.25 | ***216*** | **CLTC** | 22.53 | 1.31E-05 | | 1.19 |
| ***7*** | **KRT13** | | 124.45 | 2.35E-05 | 1.82 | ***77*** | | **RIT1** | 6.6 | | 2.34E-04 | | ***1.41*** | | ***147*** | **VPS37B** | 11.94 | 1.62E-04 | | 1.25 | ***217*** | **TNKS2** | 22.02 | 1.36E-04 | | 1.19 |
| ***8*** | **CLCA2** | | 7.56 | 5.82E-05 | 1.75 | ***78*** | | **AMOTL1** | 13.61 | | 3.70E-04 | | ***1.41*** | | ***148*** | **FAT1** | 38.62 | 4.05E-04 | | 1.25 | ***218*** | **FABP5** | 398.15 | 2.92E-04 | | 1.19 |
| ***9*** | **MFSD4A** | | 2.12 | 2.53E-03 | 1.75 | ***79*** | | **ECM1** | 8.57 | | 1.52E-03 | | ***1.4*** | | ***149*** | **IRF2BP2** | 32.79 | 4.12E-04 | | 1.25 | ***219*** | **RPS6KA3** | 21.67 | 6.53E-04 | | 1.19 |
| ***10*** | **CDKN2A** | | 11.24 | 4.09E-03 | 1.75 | ***80*** | | **ZNF518B** | 2.99 | | 2.39E-03 | | ***1.4*** | | ***150*** | **ETV3** | 14.15 | 9.01E-04 | | 1.25 | ***220*** | **SNRNP200** | 7.9 | 2.85E-03 | | 1.19 |
| ***11*** | **CXCL17** | | 9.04 | 7.30E-03 | 1.72 | ***81*** | | **TRIM22** | 3.01 | | 4.90E-03 | | ***1.4*** | | ***151*** | **ADAMTS9** | 18.15 | 6.45E-03 | | 1.25 | ***221*** | **GSN** | 33.29 | 3.55E-03 | | 1.19 |
| ***12*** | **KRT6A** | | 334.47 | 6.04E-11 | 1.69 | ***82*** | | **AKR1C2** | 9.36 | | 7.93E-03 | | ***1.4*** | | ***152*** | **SOS1** | 4.02 | 7.88E-03 | | 1.25 | ***222*** | **TMPRSS11D** | 35.24 | 4.25E-03 | | 1.19 |
| ***13*** | **DSG1** | | 50.48 | 2.74E-10 | 1.67 | ***83*** | | **C19orf33** | 41.11 | | 1.71E-12 | | ***1.4*** | | ***153*** | **KRT5** | 1363.54 | 1.31E-14 | | 1.23 | ***223*** | **UBE2V1** | 7.09 | 7.06E-03 | | 1.19 |
| ***14*** | **NME2** | | 3.42 | 7.30E-09 | 1.61 | ***84*** | | **SERPINB1** | 267.65 | | 7.22E-10 | | ***1.4*** | | ***154*** | **S100A16** | 159.47 | 2.78E-09 | | 1.23 | ***224*** | **AQP3** | 96.55 | 7.25E-03 | | 1.19 |
| ***15*** | **LINC02154** | | 4.66 | 4.51E-04 | 1.61 | ***85*** | | **LINC00958** | 31.03 | | 2.28E-05 | | ***1.39*** | | ***155*** | **NORAD** | 29.45 | 4.15E-08 | | 1.23 | ***225*** | **CRCP** | 6.89 | 7.35E-03 | | 1.19 |
| ***16*** | **S100A4** | | 548.11 | 3.14E-08 | 1.59 | ***86*** | | **GRAMD2B** | 11.93 | | 3.84E-05 | | ***1.39*** | | ***156*** | **PHLDA2** | 863.87 | 8.27E-08 | | 1.23 | ***226*** | **MIA3** | 7.56 | 8.98E-03 | | 1.19 |
| ***17*** | **SLPI** | | 189.63 | 8.93E-04 | 1.59 | ***87*** | | **KRT16** | 119.49 | | 4.75E-04 | | ***1.39*** | | ***157*** | **GJB5** | 20.19 | 1.80E-05 | | 1.23 | ***227*** | **FBXO3** | 10.34 | 9.47E-03 | | 1.19 |
| ***18*** | **LYPD3** | | 213.44 | 5.15E-09 | 1.56 | ***88*** | | **CYB5R2** | 5.56 | | 9.24E-04 | | ***1.39*** | | ***158*** | **CTTNBP2NL** | 13.36 | 5.78E-05 | | 1.23 | ***228*** | **IQGAP1** | 52.7 | 2.61E-08 | | 1.18 |
| ***19*** | **CDKN2B** | | 38.84 | 3.04E-06 | 1.54 | ***89*** | | **FKBP15** | 5.03 | | 1.49E-03 | | ***1.39*** | | ***159*** | **BAIAP2L1** | 14.54 | 2.20E-04 | | 1.23 | ***229*** | **MAL2** | 140.6 | 3.06E-08 | | 1.18 |
| ***20*** | **PTGES** | | 6.03 | 9.10E-05 | 1.54 | ***90*** | | **DCUN1D3** | 5.57 | | 2.22E-03 | | ***1.39*** | | ***160*** | **ANXA11** | 36.68 | 2.32E-04 | | 1.23 | ***230*** | **TPM3** | 75.57 | 2.18E-07 | | 1.18 |
| ***21*** | **AC010503.4** | | 2.79 | 3.38E-04 | 1.54 | ***91*** | | **TMEM40** | 11.21 | | 2.68E-03 | | ***1.39*** | | ***161*** | **PFKP** | 9.14 | 4.24E-04 | | 1.23 | ***231*** | **TM4SF1** | 702.64 | 2.48E-07 | | 1.18 |
| ***22*** | **ABAT** | | 4.05 | 2.43E-03 | 1.54 | ***92*** | | **LMBR1** | 2.62 | | 2.82E-03 | | ***1.39*** | | ***162*** | **CPEB4** | 25.57 | 5.34E-04 | | 1.23 | ***232*** | **VASP** | 48.76 | 1.02E-06 | | 1.18 |
| ***23*** | **ABCA12** | | 4.82 | 5.66E-03 | 1.54 | ***93*** | | **NOTCH3** | 3.82 | | 6.13E-03 | | ***1.39*** | | ***163*** | **C6orf106** | 9.4 | 7.89E-04 | | 1.23 | ***233*** | **TAGLN2** | 60.34 | 1.47E-06 | | 1.18 |
| ***24*** | **TRIP10** | | 8.84 | 1.00E-06 | 1.52 | ***94*** | | **RAPGEF1** | 3.28 | | 6.59E-03 | | ***1.39*** | | ***164*** | **ATP6V0A1** | 9.56 | 1.90E-03 | | 1.23 | ***234*** | **IPO7** | 29.71 | 8.34E-06 | | 1.18 |
| ***25*** | **POLR2J3** | | 7.93 | 4.33E-05 | 1.52 | ***95*** | | **C15orf39** | 2.45 | | 9.00E-03 | | ***1.38*** | | ***165*** | **NECTIN4** | 21.92 | 2.99E-03 | | 1.23 | ***235*** | **IL6ST** | 25.97 | 1.14E-05 | | 1.18 |
| ***26*** | **GPX2** | | 3.83 | 1.28E-03 | 1.52 | ***96*** | | **DSP** | 535.72 | | 2.31E-15 | | ***1.38*** | | ***166*** | **ALDH1A3** | 40.83 | 3.91E-03 | | 1.23 | ***236*** | **STAU1** | 24.38 | 1.29E-05 | | 1.18 |
| ***27*** | **CLEC7A** | | 3.27 | 4.47E-03 | 1.52 | ***97*** | | **RCOR1** | 41.82 | | 3.97E-10 | | ***1.38*** | | ***167*** | **FAM129B** | 8.98 | 4.97E-03 | | 1.23 | ***237*** | **NDRG1** | 105.25 | 1.61E-05 | | 1.18 |
| ***28*** | **CRTAC1** | | 39.75 | 2.99E-06 | 1.49 | ***98*** | | **ASPH** | 39.89 | | 5.85E-09 | | ***1.38*** | | ***168*** | **SEMA4B** | 13.18 | 6.62E-03 | | 1.23 | ***238*** | **TRIP12** | 23.15 | 7.50E-05 | | 1.18 |
| ***29*** | **TJP2** | | 3.88 | 5.08E-06 | 1.49 | ***99*** | | **PKP1** | 40.7 | | 2.86E-08 | | ***1.38*** | | ***169*** | **CAST** | 337.87 | 2.79E-15 | | 1.22 | ***239*** | **EIF2S3** | 14.05 | 2.06E-04 | | 1.18 |
| ***30*** | **PLAT** | | 37.29 | 3.42E-03 | 1.49 | ***100*** | | **FRMD6** | 27.49 | | 3.58E-06 | | ***1.38*** | | ***170*** | **RIOK3** | 60.18 | 7.61E-10 | | 1.22 | ***240*** | **CAMSAP1** | 28.17 | 3.92E-04 | | 1.18 |
| ***31*** | **CD24** | | 19.03 | 6.01E-03 | 1.49 | ***101*** | | **HS3ST1** | 53.71 | | 1.01E-05 | | ***1.38*** | | ***171*** | **KRT17** | 1228.53 | 2.94E-07 | | 1.22 | ***241*** | **WASL** | 22.15 | 5.81E-04 | | 1.18 |
| ***32*** | **APOBEC3A** | | 608.45 | 3.23E-07 | 1.47 | ***102*** | | **SCARB2** | 9.02 | | 8.06E-05 | | ***1.38*** | | ***172*** | **PLS3** | 65.48 | 3.17E-07 | | 1.22 | ***242*** | **CSNK1E** | 24.86 | 1.23E-03 | | 1.18 |
| ***33*** | **LINC02178** | | 3.05 | 6.87E-03 | 1.47 | ***103*** | | **TGFA** | 9.24 | | 1.37E-04 | | ***1.38*** | | ***173*** | **FAM83B** | 36.07 | 1.41E-06 | | 1.22 | ***243*** | **C9orf16** | 26.8 | 2.23E-03 | | 1.18 |
| ***34*** | **TMEM238** | | 6.45 | 3.18E-05 | 1.45 | ***104*** | | **BID** | 5.87 | | 2.34E-04 | | ***1.37*** | | ***174*** | **GJB3** | 45.61 | 1.48E-06 | | 1.22 | ***244*** | **OSBPL2** | 12.16 | 2.67E-03 | | 1.18 |
| ***35*** | **TRPV3** | | 6.89 | 1.26E-03 | 1.45 | ***105*** | | **RBM47** | 7.84 | | 5.90E-04 | | ***1.37*** | | ***175*** | **LRRC8A** | 27.64 | 2.28E-05 | | 1.22 | ***245*** | **ETS1** | 20.06 | 4.46E-03 | | 1.18 |
| ***36*** | **EMP1** | | 577.36 | 2.67E-15 | 1.43 | ***106*** | | **TMEM217** | 8.71 | | 6.05E-04 | | ***1.37*** | | ***176*** | **SGMS2** | 78.66 | 2.58E-05 | | 1.22 | ***246*** | **RASA2** | 13.08 | 9.15E-03 | | 1.18 |
| ***37*** | **CST3** | 176.94 | | 2.75E-09 | 1.43 | ***107*** | | **CLDN7** | 54.25 | | 5.05E-03 | | ***1.37*** | | ***177*** | **TSC22D2** | 55.43 | 4.08E-05 | | 1.22 | ***247*** | **ALDH1A1** | 61.86 | 9.57E-03 | | 1.18 |
| ***38*** | **SDCBP2** | 44.98 | | 7.61E-08 | 1.43 | ***108*** | | **ARL5B** | 83.8 | | 4.96E-11 | | ***1.37*** | | ***178*** | **DBI** | 32.48 | 4.13E-05 | | 1.22 | ***248*** | **S100A10** | 840.03 | 2.58E-10 | | 1.16 |
| ***39*** | **GRHL1** | 9.39 | | 2.69E-05 | 1.43 | ***109*** | | **VPS4B** | 70.87 | | 2.40E-10 | | ***1.37*** | | ***179*** | **ZNFX1** | 11.86 | 6.21E-05 | | 1.22 | ***249*** | **WASF2** | 37.08 | 3.28E-06 | | 1.16 |
| ***40*** | **TMPRSS4** | 8.82 | | 3.91E-04 | 1.43 | ***110*** | | **PHPT1** | 23.62 | | 1.26E-08 | | ***1.37*** | | ***180*** | **OXSR1** | 23.42 | 8.84E-05 | | 1.22 | ***250*** | **RPL17** | 25.57 | 9.85E-06 | | 1.16 |
| ***41*** | **FAM83A** | 18.61 | | 5.23E-04 | 1.43 | ***111*** | | **PTBP3** | 24.34 | | 3.46E-08 | | ***1.36*** | | ***181*** | **FGD6** | 26.94 | 1.23E-04 | | 1.22 | ***251*** | **AHNAK** | 72.77 | 2.22E-05 | | 1.16 |
| ***42*** | **GALNT7** | 2.83 | | 9.78E-03 | 1.43 | ***112*** | | **KIAA1217** | 29.49 | | 2.49E-07 | | ***1.36*** | | ***182*** | **PLEKHM1** | 13.13 | 2.12E-04 | | 1.22 | ***252*** | **EIF4G1** | 38.23 | 8.12E-05 | | 1.16 |
| ***43*** | **RHOD** | 16.13 | | 4.30E-08 | 1.41 | ***113*** | | **ATP2B4** | 14.27 | | 2.24E-05 | | ***1.36*** | | ***183*** | **PHLDA3** | 24.86 | 5.73E-04 | | 1.22 | ***253*** | **CAP1** | 32.01 | 1.21E-04 | | 1.16 |
| ***44*** | **S100A14** | 84.15 | | 2.14E-06 | 1.41 | ***114*** | | **TUBB6** | 16.1 | | 1.48E-04 | | ***1.36*** | | ***184*** | **KIF2A** | 20.48 | 7.44E-04 | | 1.22 | ***254*** | **GARS** | 25.19 | 8.10E-04 | | 1.16 |
| ***45*** | **SULT2B1** | 28.32 | | 2.98E-06 | 1.41 | ***115*** | | **HIST1H1E** | 8.72 | | 1.61E-04 | | ***1.36*** | | ***185*** | **NDUFA4L2** | 33.47 | 1.45E-03 | | 1.22 | ***255*** | **LMO7** | 178.31 | 9.36E-04 | | 1.16 |
| ***46*** | **PTPRE** | 15.08 | | 1.30E-05 | 1.41 | ***116*** | | **SLC9A2** | 5.66 | | 1.45E-03 | | ***1.36*** | | ***186*** | **HR** | 10.42 | 1.91E-03 | | 1.22 | ***256*** | **WWTR1** | 29.25 | 9.36E-04 | | 1.16 |
| ***47*** | **ALDH3A1** | 336.66 | | 9.06E-05 | 1.41 | ***117*** | | **OSBPL10** | 4.86 | | 2.54E-03 | | ***1.36*** | | ***187*** | **SLC38A1** | 13.38 | 2.07E-03 | | 1.22 | ***257*** | **CLU** | 843.9 | 1.30E-03 | | 1.16 |
| ***48*** | **ZNF836** | 8.19 | | 9.10E-05 | 1.41 | ***118*** | | **DSG3** | 280.77 | | 8.26E-13 | | ***1.36*** | | ***188*** | **GPRC5A** | 80.6 | 3.00E-03 | | 1.22 | ***258*** | **DYNC1H1** | 12.88 | 2.59E-03 | | 1.16 |
| ***49*** | **AHNAK2** | 7.33 | | 1.01E-04 | 1.41 | ***119*** | | **STK24** | 14.81 | | 1.92E-06 | | ***1.36*** | | ***189*** | **PITPNC1** | 9.58 | 3.65E-03 | | 1.22 | ***259*** | **DUSP5** | 82.53 | 3.55E-03 | | 1.16 |
| ***50*** | **RAB11FIP1** | 22.1 | | 4.20E-04 | 1.41 | ***120*** | | **IL36G** | 318.56 | | 2.46E-05 | | ***1.35*** | | ***190*** | **DDX3X** | 72.22 | 1.63E-07 | | 1.20 | ***260*** | **MICAL2** | 16.98 | 4.34E-03 | | 1.16 |
| ***51*** | **CEACAM1** | 8.06 | | 1.34E-03 | 1.41 | ***121*** | | **CD82** | 8.43 | | 1.11E-03 | | ***1.35*** | | ***191*** | **ARPC5L** | 43.83 | 2.50E-07 | | 1.20 | ***261*** | **IRF2** | 15.55 | 5.70E-03 | | 1.16 |
| ***52*** | **ZNF407** | 1.98 | | 2.93E-03 | 1.41 | ***122*** | | **EXOC6B** | 3.53 | | 5.36E-03 | | ***1.35*** | | ***192*** | **ELK3** | 49.24 | 4.86E-07 | | 1.20 | ***262*** | **ITGA6** | 45.97 | 9.20E-03 | | 1.16 |
| ***53*** | **MYO5B** | 15.52 | | 3.01E-09 | 1.39 | ***123*** | | **LMTK2** | 6.7 | | 6.80E-03 | | ***1.35*** | | ***193*** | **PPP1R14B** | 76.16 | 3.87E-06 | | 1.20 | ***263*** | **RAC1** | 109.14 | 1.85E-11 | | 1.15 |
| ***54*** | **NQO1** | 70.69 | | 4.15E-07 | 1.39 | ***124*** | | **SERPINB5** | 311.66 | | 4.49E-17 | | ***1.35*** | | ***194*** | **CORO1C** | 24.96 | 6.20E-06 | | 1.20 | ***264*** | **CDH1** | 119.88 | 8.92E-07 | | 1.15 |
| ***55*** | **ADIRF** | 277.17 | | 7.09E-07 | 1.39 | ***125*** | | **BZW1** | 99.45 | | 5.84E-14 | | ***1.35*** | | ***195*** | **ATOX1** | 21.48 | 1.64E-05 | | 1.20 | ***265*** | **RGS12** | 62.83 | 9.46E-06 | | 1.15 |
| ***56*** | **TNFRSF10A** | 6.66 | | 1.62E-06 | 1.39 | ***126*** | | **EFHD2** | 30.77 | | 5.42E-08 | | ***1.35*** | | ***196*** | **PARD6B** | 41.37 | 2.34E-05 | | 1.20 | ***266*** | **ETF1** | 41.01 | 1.74E-05 | | 1.15 |
| ***57*** | **IL1RN** | 86.99 | | 2.42E-06 | 1.39 | ***127*** | | **TRIM29** | 40.75 | | 1.90E-07 | | ***1.35*** | | ***197*** | **CRB3** | 30.72 | 1.52E-04 | | 1.20 | ***267*** | **DRAP1** | 96.02 | 1.86E-05 | | 1.15 |
| ***58*** | **FRMD8** | 5.81 | | 1.45E-04 | 1.39 | ***128*** | | **TXN** | 924.62 | | 2.22E-07 | | ***1.35*** | | ***198*** | **GIPC1** | 25.16 | 4.58E-04 | | 1.20 | ***268*** | **DIAPH1** | 36.71 | 7.30E-05 | | 1.15 |
| ***59*** | **AC016831.1** | 7.18 | | 1.14E-03 | 1.39 | ***129*** | | **ITGA2** | 89.33 | | 3.00E-07 | | ***1.35*** | | ***199*** | **PLEC** | 18.47 | 8.31E-04 | | 1.20 | ***269*** | **DDX27** | 25.76 | 2.37E-04 | | 1.15 |
| ***60*** | **PTPN21** | 1.88 | | 1.90E-03 | 1.39 | ***130*** | | **ST14** | 42.69 | | 5.69E-07 | | ***1.35*** | | ***200*** | **ZNF770** | 14.21 | 8.48E-04 | | 1.20 | ***270*** | **NRIP1** | 53.24 | 3.18E-04 | | 1.15 |
| ***61*** | **ASAP2** | 3.16 | | 6.25E-03 | 1.39 | ***131*** | | **PPP1CA** | 11.9 | | 3.13E-06 | | ***1.35*** | | ***201*** | **PPP4R1** | 15.17 | 1.85E-03 | | 1.20 | ***271*** | **LRIF1** | 38.31 | 5.51E-04 | | 1.15 |
| ***62*** | **TKT** | 106.57 | | 8.93E-16 | 1.37 | ***132*** | | **ABLIM1** | 20.31 | | 4.43E-05 | | ***1.35*** | | ***202*** | **GATAD2A** | 9.93 | 2.05E-03 | | 1.20 | ***272*** | **ARCN1** | 15.86 | 5.90E-04 | | 1.15 |
| ***63*** | **TMBIM1** | 14.82 | | 4.70E-08 | 1.37 | ***133*** | | **EHD4** | 11.6 | | 2.19E-04 | | ***1.35*** | | ***203*** | **IGFBP3** | 113.26 | 2.44E-03 | | 1.20 | ***273*** | **CHMP4B** | 22.35 | 6.99E-04 | | 1.15 |
| ***64*** | **DSC2** | 260.1 | | 7.64E-08 | 1.37 | ***134*** | | **TOMM34** | 5.74 | | 5.51E-04 | | ***1.35*** | | ***204*** | **SYNJ2** | 22.95 | 3.81E-03 | | 1.20 | ***274*** | **STIP1** | 19.41 | 9.21E-04 | | 1.15 |
| ***65*** | **HBEGF** | 143.6 | | 3.98E-07 | 1.37 | ***135*** | | **GNA15** | 8.69 | | 1.27E-03 | | ***1.35*** | | ***205*** | **KDM1A** | 10.05 | 4.95E-03 | | 1.20 | ***275*** | **MARK3** | 24.66 | 1.20E-03 | | 1.15 |
| ***66*** | **INPP1** | 17.32 | | 2.15E-06 | 1.37 | ***136*** | | **CTSD** | 14.57 | | 1.30E-03 | | ***1.35*** | | ***206*** | **GMEB1** | 5.82 | 9.52E-03 | | 1.20 | ***276*** | **ZMAT2** | 15.8 | 1.26E-03 | | 1.15 |
| ***67*** | **SDC1** | 23.41 | | 2.80E-04 | 1.37 | ***137*** | | **MYH14** | 11.03 | | 1.77E-03 | | ***1.34*** | | ***207*** | **C1orf74** | 14.31 | 9.94E-03 | | 1.20 | ***277*** | **MORC3** | 18.32 | 1.29E-03 | | 1.15 |
| ***68*** | **ZNF841** | 4.65 | | 3.16E-04 | 1.37 | ***138*** | | **CYTOR** | 12.57 | | 8.56E-03 | | ***1.34*** | | ***208*** | **YWHAZ** | 228.13 | 2.69E-12 | | 1.19 | ***278*** | **AP1G1** | 18.44 | 1.71E-03 | | 1.15 |
| ***69*** | **RALB** | 4.87 | | 3.69E-04 | 1.37 | ***139*** | | **ARHGEF2** | 4.7 | | 8.93E-03 | | ***1.34*** | | ***209*** | **JUP** | 90.11 | 3.62E-10 | | 1.19 | ***279*** | **TRIM44** | 16.01 | 1.75E-03 | | 1.15 |
| ***70*** | **CBL** | 3.29 | | 2.59E-03 | 1.37 | ***140*** | | **EZR** | 535.65 | | 3.00E-13 | | ***1.34*** | | ***210*** | ***ARID1B*** | ***4.67*** | ***3.83E-03*** | | ***1.29*** | ***280*** | **PIM1** | 59.14 | 2.13E-03 | | ***1.24*** |

…..

….

| *Rank* | Gene ID | 1/R | |  |  |  | | |  | |  |  | |  |  |  | | |  | | |  | | |  | |  |  | | | |  | |  | |  | |
| --- | --- | --- | --- | --- | --- | --- | --- | --- | --- | --- | --- | --- | --- | --- | --- | --- | --- | --- | --- | --- | --- | --- | --- | --- | --- | --- | --- | --- | --- | --- | --- | --- | --- | --- | --- | --- | --- |
| ***281*** | **PPP4R3A** | 13.15 | | 3.42E-03 | 1.15 | ***314*** | | | **PEA15** | | 44.95 | 9.65E-05 | | 1.12 | ***348*** | **RPS10** | | | 158.59 | | | 5.01E-08 | | | 1.10 | | ***379*** | **ZRANB2** | | | | 35.54 | | 6.91E-03 | | 1.19 | |
| ***282*** | **ISG20** | 85.09 | | 4.27E-03 | 1.15 | ***316*** | | | **TARS** | | 43.43 | 1.63E-03 | | 1.12 | ***349*** | **RACK1** | | | 197.13 | | | 1.48E-06 | | | 1.10 | | ***380*** | **IRF6** | | | | 139.42 | | 7.16E-03 | | 1.19 | |
| ***283*** | **STAG2** | 13.47 | | 4.71E-03 | 1.15 | ***317*** | | | **MT-ATP8** | | 24.32 | 2.40E-03 | | 1.12 | ***350*** | **RPL31** | | | 123.99 | | | 1.67E-06 | | | 1.10 | | ***381*** | **RPS8** | | | | 558.64 | | 8.79E-07 | | 1.19 | |
| ***284*** | **ACIN1** | 11.16 | | 5.96E-03 | 1.15 | ***318*** | | | **ARHGAP5** | | 39.21 | 3.14E-03 | | 1.12 | ***351*** | **CSNK1A1** | | | 126.78 | | | 5.83E-06 | | | 1.10 | | ***382*** | **RPL27A** | | | | 260.98 | | 5.03E-06 | | 1.19 | |
| ***285*** | **NUPR1** | 38.12 | | 6.27E-03 | 1.15 | ***319*** | | | **AFF4** | | 34.09 | 3.18E-03 | | 1.12 | ***352*** | **PRRC2C** | | | 92.84 | | | 6.57E-05 | | | 1.10 | | ***383*** | **CDKN1A** | | | | 234.71 | | 6.89E-04 | | 1.19 | |
| ***286*** | **VEGFA** | 52.1 | | 6.52E-03 | 1.15 | ***320*** | | | **NOLC1** | | 34.05 | 4.96E-03 | | 1.12 | ***353*** | **EIF1AX** | | | 104.82 | | | 1.44E-04 | | | 1.10 | | ***384*** | **PABPC1** | | | | 163.18 | | 9.06E-04 | | 1.19 | |
| ***287*** | **VAMP3** | 9.57 | | 9.02E-03 | 1.15 | ***321*** | | | **SRPRA** | | 20.05 | 5.20E-03 | | 1.12 | ***354*** | **CD44** | | | 95.25 | | | 3.70E-04 | | | 1.10 | | ***385*** | **SH3BGRL3** | | | | 357.65 | | 2.05E-03 | | 1.19 | |
| ***288*** | **RPL23** | 239.83 | | 1.49E-11 | 1.14 | ***322*** | | | **ZFAND6** | | 30.41 | 6.37E-03 | | 1.12 | ***355*** | **EIF2S2** | | | 86.23 | | | 5.77E-04 | | | 1.10 | | ***386*** | **ATP5F1E** | | | | 70 | | 2.69E-03 | | 1.19 | |
| ***289*** | **S100A11** | 1270.4 | | 2.20E-09 | 1.14 | ***323*** | | | **SYAP1** | | 19.34 | 6.61E-03 | | 1.12 | ***356*** | **LGALS3** | | | 227.77 | | | 1.10E-03 | | | 1.10 | | ***387*** | **HLA-C** | | | | 102.27 | | 5.49E-03 | | 1.19 | |
| ***290*** | **DENND2C** | 132.65 | | 3.69E-07 | 1.14 | ***324*** | | | **FBLIM1** | | 33.63 | 7.09E-03 | | 1.12 | ***357*** | **ENO1** | | | 172.74 | | | 1.29E-03 | | | 1.10 | | ***388*** | **RAP1B** | | | | 77.79 | | 8.25E-03 | | 1.19 | |
| ***291*** | **LRRFIP1** | 130.38 | | 8.74E-07 | 1.14 | ***325*** | | | **AKAP13** | | 28.81 | 7.12E-03 | | 1.12 | ***358*** | **PAIP2** | | | 35.98 | | | 1.43E-03 | | | 1.10 | | ***389*** | **ELOC** | | | | 65.7 | | 9.02E-03 | | 1.19 | |
| ***292*** | **MACF1** | 76.42 | | 2.70E-06 | 1.14 | ***326*** | | | **KLF13** | | 28.65 | 7.54E-03 | | 1.12 | ***359*** | **RPL36A** | | | 43.97 | | | 1.50E-03 | | | 1.10 | | ***390*** | **ABI1** | | | | 55.5 | | 9.61E-03 | | 1.19 | |
| ***293*** | **TMCC3** | 81.07 | | 1.79E-05 | 1.14 | ***327*** | | | **RHOG** | | 14.94 | 9.24E-03 | | 1.12 | ***360*** | **CD9** | | | 152.32 | | | 1.59E-03 | | | 1.10 | | ***391*** | **RPLP2** | | | | 348.78 | | 1.27E-06 | | 1.19 | |
| ***294*** | **AFDN** | 46.74 | | 7.65E-05 | 1.14 | ***328*** | | | **KCNK1** | | 41.83 | 9.69E-03 | | 1.12 | ***361*** | **SERPINB8** | | | 43.05 | | | 2.44E-03 | | | 1.10 | | ***392*** | **RPS11** | | | | 262.27 | | 4.87E-05 | | 1.19 | |
| ***295*** | **C1orf116** | 64.59 | | 2.29E-04 | 1.14 | ***329*** | | | **RPL28** | | 473.65 | 3.60E-13 | | 1.11 | ***362*** | **ATG101** | | | 34.78 | | | 2.92E-03 | | | 1.10 | | ***393*** | **RPS19** | | | | 705.73 | | 9.67E-05 | | 1.19 | |
| ***296*** | **SNX9** | 59.86 | | 4.17E-04 | 1.14 | ***330*** | | | **TPT1** | | 2601.19 | 5.13E-12 | | 1.11 | ***363*** | **DNAJA2** | | | 29.44 | | | 4.06E-03 | | | 1.10 | | ***394*** | **RPL23A** | | | | 397.69 | | 2.25E-04 | | 1.19 | |
| ***297*** | **CFLAR** | 78.77 | | 9.23E-04 | 1.14 | ***331*** | | | **ARPC2** | | 125.16 | 5.01E-06 | | 1.11 | ***364*** | **SSR4** | | | 42.25 | | | 4.80E-03 | | | 1.10 | | ***395*** | **ANXA2** | | | | 597.81 | | 9.05E-04 | | 1.19 | |
| ***298*** | **ZBTB7A** | 34.57 | | 1.32E-03 | 1.14 | ***332*** | | | **DSC3** | | 149.92 | 1.27E-05 | | 1.11 | ***365*** | **XRCC5** | | | 29.75 | | | 5.06E-03 | | | 1.10 | | ***396*** | **MT-ND5** | | | | 216.24 | | 1.30E-03 | | 1.18 | |
| ***299*** | **ATP6V1D** | 24.8 | | 2.05E-03 | 1.14 | ***333*** | | | **GNG5** | | 73.33 | 1.89E-05 | | 1.11 | ***366*** | **HSP90B1** | | | 92.91 | | | 5.74E-03 | | | 1.10 | | ***397*** | **MYL12B** | | | | 129.35 | | 3.81E-03 | | 1.18 | |
| ***300*** | **TUT7** | 19.57 | | 4.96E-03 | 1.14 | ***334*** | | | **GSTP1** | | 381.09 | 2.70E-05 | | 1.11 | ***367*** | **CLTB** | | | 51.55 | | | 5.94E-03 | | | 1.10 | | ***398*** | **RPL41** | | | | 920.56 | | 7.22E-06 | | 1.18 | |
| ***301*** | **NRBF2** | 26.87 | | 5.06E-03 | 1.14 | ***335*** | | | **ZNF706** | | 73.63 | 4.88E-05 | | 1.11 | ***368*** | **CAPN2** | | | 39.6 | | | 6.92E-03 | | | 1.10 | | ***399*** | **RPS15** | | | | 464.84 | | 2.73E-05 | | 1.18 | |
| ***302*** | **MPRIP** | 21.17 | | 5.21E-03 | 1.14 | ***336*** | | | **ANXA1** | | 4245.15 | 1.37E-04 | | 1.11 | ***369*** | **SPINT2** | | | 52.46 | | | 9.56E-03 | | | 1.10 | | ***400*** | **RPL24** | | | | 635.14 | | 4.69E-04 | | 1.18 | |
| ***303*** | **MIER1** | 16.65 | | 5.45E-03 | 1.14 | ***337*** | | | **HNRNPU** | | 104.14 | 1.48E-04 | | 1.11 | ***370*** | **SFN** | | | 2892.53 | | | 6.34E-05 | | | 1.09 | | ***401*** | **RPL26** | | | | 407.31 | | 6.91E-04 | | 1.18 | |
| ***304*** | **REEP3** | 15.64 | | 5.60E-03 | 1.14 | ***338*** | | | **MT-ND4L** | | 54.11 | 3.75E-04 | | 1.11 | ***371*** | **CDC42** | | | 80.38 | | | 9.96E-05 | | | 1.09 | | ***402*** | **RPS24** | | | | 547.04 | | 8.35E-04 | | 1.18 | |
| ***305*** | **SSFA2** | 41.32 | | 5.65E-03 | 1.14 | | ***339*** | | **DDX21** | | 100.53 | 3.93E-04 | | 1.11 | ***372*** | **SERP1** | | | 116.33 | | | 8.97E-04 | | | 1.09 | | ***403*** | **RPL37A** | | | | 392.12 | | 9.56E-04 | | 1.18 | |
| ***306*** | **HIVEP1** | 16.98 | | 6.27E-03 | 1.14 | | ***340*** | | **NCL** | | 192.07 | 9.22E-04 | | 1.11 | ***373*** | **SRRM2** | | | 55.24 | | | 2.04E-03 | | | 1.09 | | ***404*** | **RPS21** | | | | 192.16 | | 1.51E-03 | | 1.18 | |
| ***307*** | **FXYD3** | 57 | | 6.65E-03 | 1.14 | | ***341*** | | **GSPT1** | | 52.08 | 1.14E-03 | | 1.11 | ***374*** | **KTN1** | | | 71.91 | | | 2.23E-03 | | | 1.09 | | ***405*** | **RPL18A** | | | | 469.1 | | 1.98E-03 | | 1.18 | |
| ***308*** | **HSPB1** | 271.54 | | 7.09E-03 | 1.14 | | ***342*** | | **PFN1** | | 126.56 | 1.38E-03 | | 1.11 | ***375*** | **GNAI3** | | | 44.55 | | | 4.06E-03 | | | 1.09 | | ***406*** | **EEF2** | | | | 121.89 | | 4.17E-03 | | 1.18 | |
| ***309*** | **DIS3** | 17.84 | | 8.25E-03 | 1.14 | | ***343*** | | **CD55** | | 337.78 | 1.45E-03 | | 1.11 | ***376*** | **GUK1** | | | 54.1 | | | 4.16E-03 | | | 1.09 | | ***407*** | **CHCHD2** | | | | 142 | | 4.90E-03 | | 1.18 | |
| ***310*** | **GPNMB** | 42.81 | | 9.46E-03 | 1.14 | | ***344*** | | **PLP2** | | 52.36 | 3.80E-03 | | 1.11 | ***377*** | **RAB10** | | | 45.65 | | | 4.46E-03 | | | 1.09 | | ***408*** | **NACA** | | | | 321.38 | | 7.65E-03 | | 1.18 | |
| ***311*** | **R3HDM4** | 11.2 | | 9.50E-03 | 1.14 | | ***345*** | | **PAK2** | | 31.59 | 5.77E-03 | | 1.11 | ***378*** | **KHDRBS1** | | | 39.94 | | | 6.12E-03 | | | 1.09 | | ***409*** | **RPS13** | | | | 488.71 | | 1.47E-03 | | 1.18 | |
| ***312*** | **SUZ12** | 15.58 | | 9.84E-03 | 1.14 | | ***346*** | | **RPS28** | | 394.26 | 9.29E-12 | | 1.10 |  |  | | | | |  |  | | |  | | | | |  | | |  | | |  | |  |
| ***313*** | **COX7C** | 56.14 | | 1.67E-06 | 1.12 | | ***347*** | | **RPS4X** | | 473.3 | 3.10E-08 | | 1.10 |  | |  |  | | | | |  | | |  | | |  | |  | | | |  | |
|  |  | |  |  |  | | |  | |  |  | |  |  |  | |  | | |  | | | |  | | |  | |  | |  | | | |  | |
